# Identification of New $\text{I}\kappa\text{B}\alpha$ Complexes by an Iterative Experimental and Mathematical Modeling Approach

Fabian Konrath<sup>1,2</sup>, Johannes Witt<sup>2</sup>, Thomas Sauter<sup>3</sup>, Dagmar Kulms<sup>1,4\*</sup>

**1** Institute of Cell Biology and Immunology, University of Stuttgart, Stuttgart, Germany, **2** Institute for System Dynamics, University of Stuttgart, Stuttgart, Germany, **3** Life Sciences Research Unit, University of Luxembourg, Luxembourg, Luxembourg, **4** Experimental Dermatology, Department of Dermatology, TU-Dresden, Dresden, Germany

## Abstract

The transcription factor nuclear factor kappa-B (NF $\kappa$ B) is a key regulator of pro-inflammatory and pro-proliferative processes. Accordingly, uncontrolled NF $\kappa$ B activity may contribute to the development of severe diseases when the regulatory system is impaired. Since NF $\kappa$ B can be triggered by a huge variety of inflammatory, pro- and anti-apoptotic stimuli, its activation underlies a complex and tightly regulated signaling network that also includes multi-layered negative feedback mechanisms. Detailed understanding of this complex signaling network is mandatory to identify sensitive parameters that may serve as targets for therapeutic interventions. While many details about canonical and non-canonical NF $\kappa$ B activation have been investigated, less is known about cellular  $\text{I}\kappa\text{B}\alpha$  pools that may tune the cellular NF $\kappa$ B levels.  $\text{I}\kappa\text{B}\alpha$  has so far exclusively been described to exist in two different forms within the cell: stably bound to NF $\kappa$ B or, very transiently, as unbound protein. We created a detailed mathematical model to quantitatively capture and analyze the time-resolved network behavior. By iterative refinement with numerous biological experiments, we yielded a highly identifiable model with superior predictive power which led to the hypothesis of an NF $\kappa$ B-lacking  $\text{I}\kappa\text{B}\alpha$  complex that contains stabilizing IKK subunits. We provide evidence that other but canonical pathways exist that may affect the cellular  $\text{I}\kappa\text{B}\alpha$  status. This additional  $\text{I}\kappa\text{B}\alpha$ :IKK $\gamma$  complex revealed may serve as storage for the inhibitor to antagonize undesired NF $\kappa$ B activation under physiological and pathophysiological conditions.

**Citation:** Konrath F, Witt J, Sauter T, Kulms D (2014) Identification of New  $\text{I}\kappa\text{B}\alpha$  Complexes by an Iterative Experimental and Mathematical Modeling Approach. *PLoS Comput Biol* 10(3): e1003528. doi:10.1371/journal.pcbi.1003528

**Editor:** Feilim Mac Gabhann, Johns Hopkins University, United States of America

**Received:** August 30, 2013; **Accepted:** February 3, 2014; **Published:** March 27, 2014

**Copyright:** © 2014 Konrath et al. This is an open-access article distributed under the terms of the Creative Commons Attribution License, which permits unrestricted use, distribution, and reproduction in any medium, provided the original author and source are credited.

**Funding:** This study was supported by the German Research Foundation (DFG, KU 1981/5-1). The funders had no role in study design, data collection and analysis, decision to publish, or preparation of the manuscript.

**Competing Interests:** The authors have declared that no competing interests exist.

\* E-mail: dagmar.kulms@uniklinikum-dresden.de

## Introduction

The nuclear transcription factor  $\kappa\text{B}$  (NF $\kappa$ B) family consists of five DNA-binding proteins (p65, p50, p52, cRel, RelB) that differentially modulate gene transcription. Since NF $\kappa$ B activation is involved in many cellular processes including inflammation, proliferation, angiogenesis and anti-apoptosis, only transient expression of the responsive genes ensures proper function of living cells [1]. Impairment of the regulatory system may contribute to malignant transformation, invasion and metastasis [2]. Consequently, NF $\kappa$ B controls its own activity by initiating negative feedback mechanisms including transcriptional up-regulation of cellular inhibitors [3,4]. Two independent pathways have been described to induce NF $\kappa$ B activation. While the non-canonical pathway determines the activity of p50:p52 heterodimers, the more prominent canonical pathway controls activation of p65:p50 subunits. In un-stimulated cells NF $\kappa$ B (p65:p50) resides inactively within the cytosol, bound to its inhibitor  $\text{I}\kappa\text{B}\alpha$ , which covers its nuclear localization signal [5]. Following canonical signal transduction, NF $\kappa$ B activation is triggered via the  $\text{I}\kappa\text{B}$  kinase complex (IKK), which consists of two catalytic subunits, IKK $\alpha$  and IKK $\beta$ , as well as the regulatory subunit IKK $\gamma$ . Site specific phosphorylation of IKK $\beta$  mediates downstream phosphorylation of  $\text{I}\kappa\text{B}\alpha$  at two Ser residues, serving as a signal for poly-ubiquitination and proteasomal degradation of the inhibitor.

Liberated NF $\kappa$ B subsequently translocates into the nucleus to serve its function as a transcription factor which also – and most importantly – includes induction of negative feedback regulation via  $\text{I}\kappa\text{B}\alpha$  re-synthesis [6]. The network of interaction, however, leading to activation, inhibition or post-activational attenuation of NF $\kappa$ B is very complex and can be influenced by changes in signal transduction as well as through specific modifications of the molecules involved. Since dysregulation of NF $\kappa$ B plays a major role in the development of various diseases, a number of mathematical models have been implemented to analyze the non-linear dynamical behavior of this regulatory network [7,8]. These models contributed to the analysis of the role of negative feedback loops [9–11], the description of the overall input-output behavior of the pathways [12–14], the understanding of the integration from multiple input signals [14,15], as well as to the identification of sensitive parameters [16]. However, the pattern of NF $\kappa$ B-induced gene expression may significantly change depending on the cell type, the intracellular protein-protein interaction and the physiological context. Following this line, previous studies revealed canonical NF $\kappa$ B responses to dramatically change in cells being exposed to DNA-damaging agents, including ultraviolet-B (UVB) radiation. In particular, Interleukin-1 (IL-1) stimulation was shown to protect epithelial cells from death ligand-induced apoptosis via NF $\kappa$ B-dependent up-regulation of anti-apoptotic genes. When co-irradiated with UVB, instead, IL-1 driven and

## Author Summary

In unstimulated cells, the transcription factor NF $\kappa$ B resides in the cytosol bound to its inhibitor I $\kappa$ B $\alpha$ . Canonical activation of NF $\kappa$ B by numerous stimuli leads to proteasomal depletion of I $\kappa$ B $\alpha$ , thereby liberating NF $\kappa$ B to translocate into the nucleus to induce transcription of genes leading to proliferation, angiogenesis, metastasis, or chronic inflammation. Consequently, only transient activity needs to be warranted by immediate NF $\kappa$ B-dependent induction of negative regulatory mechanisms, including up-regulation of its inhibitor I $\kappa$ B $\alpha$ . Resynthesized I $\kappa$ B $\alpha$  consequently terminates NF $\kappa$ B activity by binding to its nuclear localization sequence. However, under physiological or pathophysiological conditions, random NF $\kappa$ B activation may occur, which needs to be avoided in order to guarantee proper cellular function. Using detailed dynamical modeling, we have now identified an additional I $\kappa$ B $\alpha$  containing complex to exist in un-stimulated cells which lacks NF $\kappa$ B but includes IKK $\gamma$  (I $\kappa$ B $\alpha$ :IKK $\gamma$  complex). This additional I $\kappa$ B $\alpha$  is not depleted from cells in the canonical fashion and may therefore serve as a cellular backup to avoid random NF $\kappa$ B activation.

NF $\kappa$ B-dependent repression of anti-apoptotic genes caused enhancement of UVB-induced apoptosis [17]. As a prerequisite, nuclear persistence of NF $\kappa$ B was shown to be facilitated via UVB-induced inactivation of the catalytical subunit of Ser/Thr phosphatase PP2A, causing chronic IKK $\beta$  activation and subsequent phosphorylation and proteasomal degradation of resynthesized I $\kappa$ B $\alpha$ . Both modifications in concert were shown to drive the pro-apoptotic properties of a classical non-apoptotic protein [3,18]. Using a systems biological approach we could show that not only PP2A inactivation but also global translational inhibition appeared to be involved in preventing I $\kappa$ B $\alpha$  recurrence. Above this, translational inhibition was shown to induce I $\kappa$ B $\alpha$  depletion in cells irradiated with UVB alone, indicating both mechanisms to individually mediate UVB-dependent responses [15,19].

Similar to UVB, co-stimulation of cells with IL-1 and the tyrosine phosphatase inhibitor orthovanadate (OVA) induced tyrosine kinase cSrc-mediated inactivation of PP2A. Again here, chronic phosphorylation of IKK $\beta$  and consequently inhibition of I $\kappa$ B $\alpha$  recurrence provided for sustained NF $\kappa$ B activation [18]. In the present study we aimed to understand which additional regulatory mechanisms may exist to prevent unwanted NF $\kappa$ B activation under physiological conditions. We therefore analyzed OVA-dependent I $\kappa$ B $\alpha$  depletion as a tool to identify additional I $\kappa$ B $\alpha$  sources within the cell by iterative model refinement in combination with model inspired experimentation. The extended model predicted alternative non-canonical I $\kappa$ B $\alpha$ -degradation to occur without affecting NF $\kappa$ B activity. Respective experimental design finally revealed a yet unknown I $\kappa$ B $\alpha$ :IKK $\gamma$  complex to exist, which might serve as a backup for negative feedback regulation of NF $\kappa$ B.

## Results

### OVA treatment alone causes incomplete I $\kappa$ B $\alpha$ depletion

Stimulation of cells from the epithelial cell line KB with IL-1 caused canonical degradation of the NF $\kappa$ B inhibitor I $\kappa$ B $\alpha$  via phosphorylation of the upstream kinase IKK $\beta$  at Ser177/181. Perfectly in line with the phosphorylation pattern of IKK $\beta$ , I $\kappa$ B $\alpha$  was completely degraded 30 min after IL-1 stimulation and became resynthesized after 2 h when phosphorylation of IKK $\beta$

started to descent (Fig. 1A). Co-treatment of cells with IL-1+OVA instead accelerated phosphorylation of IKK $\beta$  causing early phosphorylation and degradation of I $\kappa$ B $\alpha$  (Fig. 1B, 15 min). Strikingly, re-accumulation of I $\kappa$ B $\alpha$  was completely inhibited under these conditions even though the phosphorylation pattern of IKK $\beta$  at later time points (2 h; 4 h) remained largely unchanged compared to IL-1 treated cells (Fig. 1A). This strongly indicated that other OVA-driven mechanisms may superimpose IL-1-mediated canonical I $\kappa$ B $\alpha$  degradation at later time points. In accordance with this assumption we could detect partial, almost linear I $\kappa$ B $\alpha$  depletion at 4–8 h after OVA only treatment, following a much slower kinetics than canonical IL-1-driven I $\kappa$ B $\alpha$  degradation (Fig. 1C). Since IKK $\beta$  phosphorylation did not seem to play a major role in delayed OVA-dependent I $\kappa$ B $\alpha$  depletion we next examined whether transcriptional or translational inhibition might be involved.

### I $\kappa$ B $\alpha$ depletion is independent of transcriptional and/or translational inhibition

Performing RT-PCR analysis we revealed the I $\kappa$ B $\alpha$  mRNA level to remain completely unchanged, even up to 8 h after OVA treatment, while being up-regulated 1 h after canonical IL-1 treatment, as a positive control (Fig. 2A). Application of the transcription inhibitor actinomycin D (ActD) strongly implied transcriptional alterations not to be involved in OVA-induced I $\kappa$ B $\alpha$  depletion. While OVA treatment alone induced a moderate and incomplete reduction of the I $\kappa$ B $\alpha$  protein (Fig. 2B) but not the respective mRNA (Fig. 2C) over time, transcriptional inhibition by ActD caused pronounced inhibition of both the mRNA and the protein level of I $\kappa$ B $\alpha$ , respectively. Of note, co-application of OVA and ActD further enhanced depletion of I $\kappa$ B $\alpha$  protein without additively affecting the transcription level (compare Fig. 2B + 2C). Results indicated that OVA-induced I $\kappa$ B $\alpha$  depletion is facilitated at the protein level, independent of transcriptional regulation. An analogous I $\kappa$ B $\alpha$  protein pattern was obtained when inhibiting translation by addition of cycloheximide (CHX). While individual treatment with either CHX or OVA caused I $\kappa$ B $\alpha$  reduction over time, co-application of both substances additively enhanced loss of I $\kappa$ B $\alpha$  (Fig. 2D). These data strongly support the concept that OVA-mediated I $\kappa$ B $\alpha$  depletion is independent of translational inhibition but might be caused by activation of upstream signaling pathways apart from canonical NF $\kappa$ B signal transduction.

### OVA-induced I $\kappa$ B $\alpha$ depletion neither follows the canonical pattern nor causes NF $\kappa$ B activation

Canonical NF $\kappa$ B activation is well known to involve Ser177/181 phosphorylation of IKK $\beta$ , followed by Ser32/36 phosphorylation of I $\kappa$ B $\alpha$  as a prerequisite for its proteasomal degradation. Stepwise documentation of canonical NF $\kappa$ B activation by Western-blot analysis and electro mobility shift assay (EMSA) revealed that OVA-induced I $\kappa$ B $\alpha$  depletion does not follow the canonical pattern. While IL-1-induced total I $\kappa$ B $\alpha$  degradation occurred as a fast process being completed after 15 min, OVA-induced subtotal I $\kappa$ B $\alpha$  depletion followed a much slower kinetics, and did not involve classical IKK $\beta$  phosphorylation (Fig. 3A). Illustrating canonical I $\kappa$ B $\alpha$  degradation by addition of the proteasome inhibitor MG132, which stabilizes phosphorylated I $\kappa$ B $\alpha$ , revealed only canonical IL-1 stimulation to cause an I $\kappa$ B $\alpha$  shift, while OVA treatment did not, but still caused I $\kappa$ B $\alpha$  depletion over time (Fig. 3B). Correspondingly, OVA depleted not only I $\kappa$ B $\alpha$ -*wt* but also the Ser32/36Ala mutant which lacks the IKK $\beta$ -dependent phosphorylation sites and can therefore not be degraded in the canonical fashion (Fig. 3C). Interestingly, EMSA

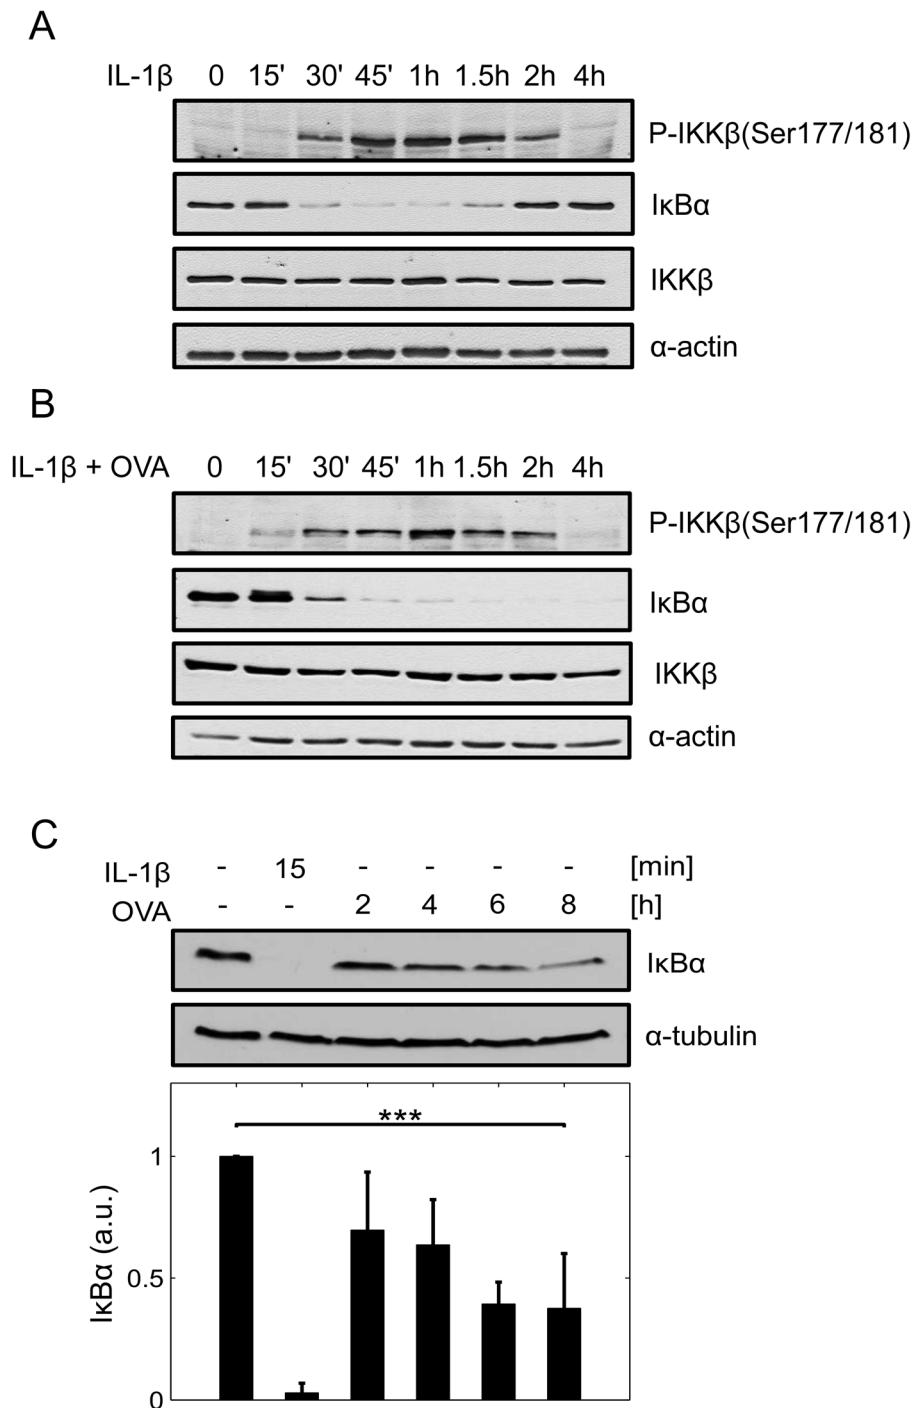

**Figure 1. OVA promotes delayed depletion of IκBα independent of IKKβ phosphorylation.** **A:** KB cells were left untreated or pre-treated with OVA (1 mM) for 1 h followed by stimulation with IL-1 (10 ng/ml). At the indicated time points following IL-1 stimulation the cellular status of P-IKKβ (Ser177/181), IκBα and IKKβ was determined by Western-blot analysis. Equal loading was monitored with an anti-α-actin antibody. **B:** Cells were left untreated, stimulated with IL-1 or OVA for the indicated time points and the cellular IκBα status determined by Western-blot analysis, α-tubulin served as a loading control, \*\*\*p<0.001. doi:10.1371/journal.pcbi.1003528.g001

revealed no significant nuclear translocation of NFκB to occur upon delayed OVA-induced IκBα depletion (Fig. 3D), indicating other than NFκB-bound IκBα pools to exist within un-stimulated cells. In order to identify this additional IκBα pool we integrated all experimental data into detailed dynamical modeling using ordinary differential equations.

#### IκBα co-exists within different protein complexes

Based on our previous NFκB signaling model [15] we generated an extended mathematical model (variant M-1, Fig. 4A). Since OVA-mediated IκBα depletion appeared to be independent of both, transcriptional/translational inhibition and proteasomal degradation, we assumed proteases to be involved in this process.

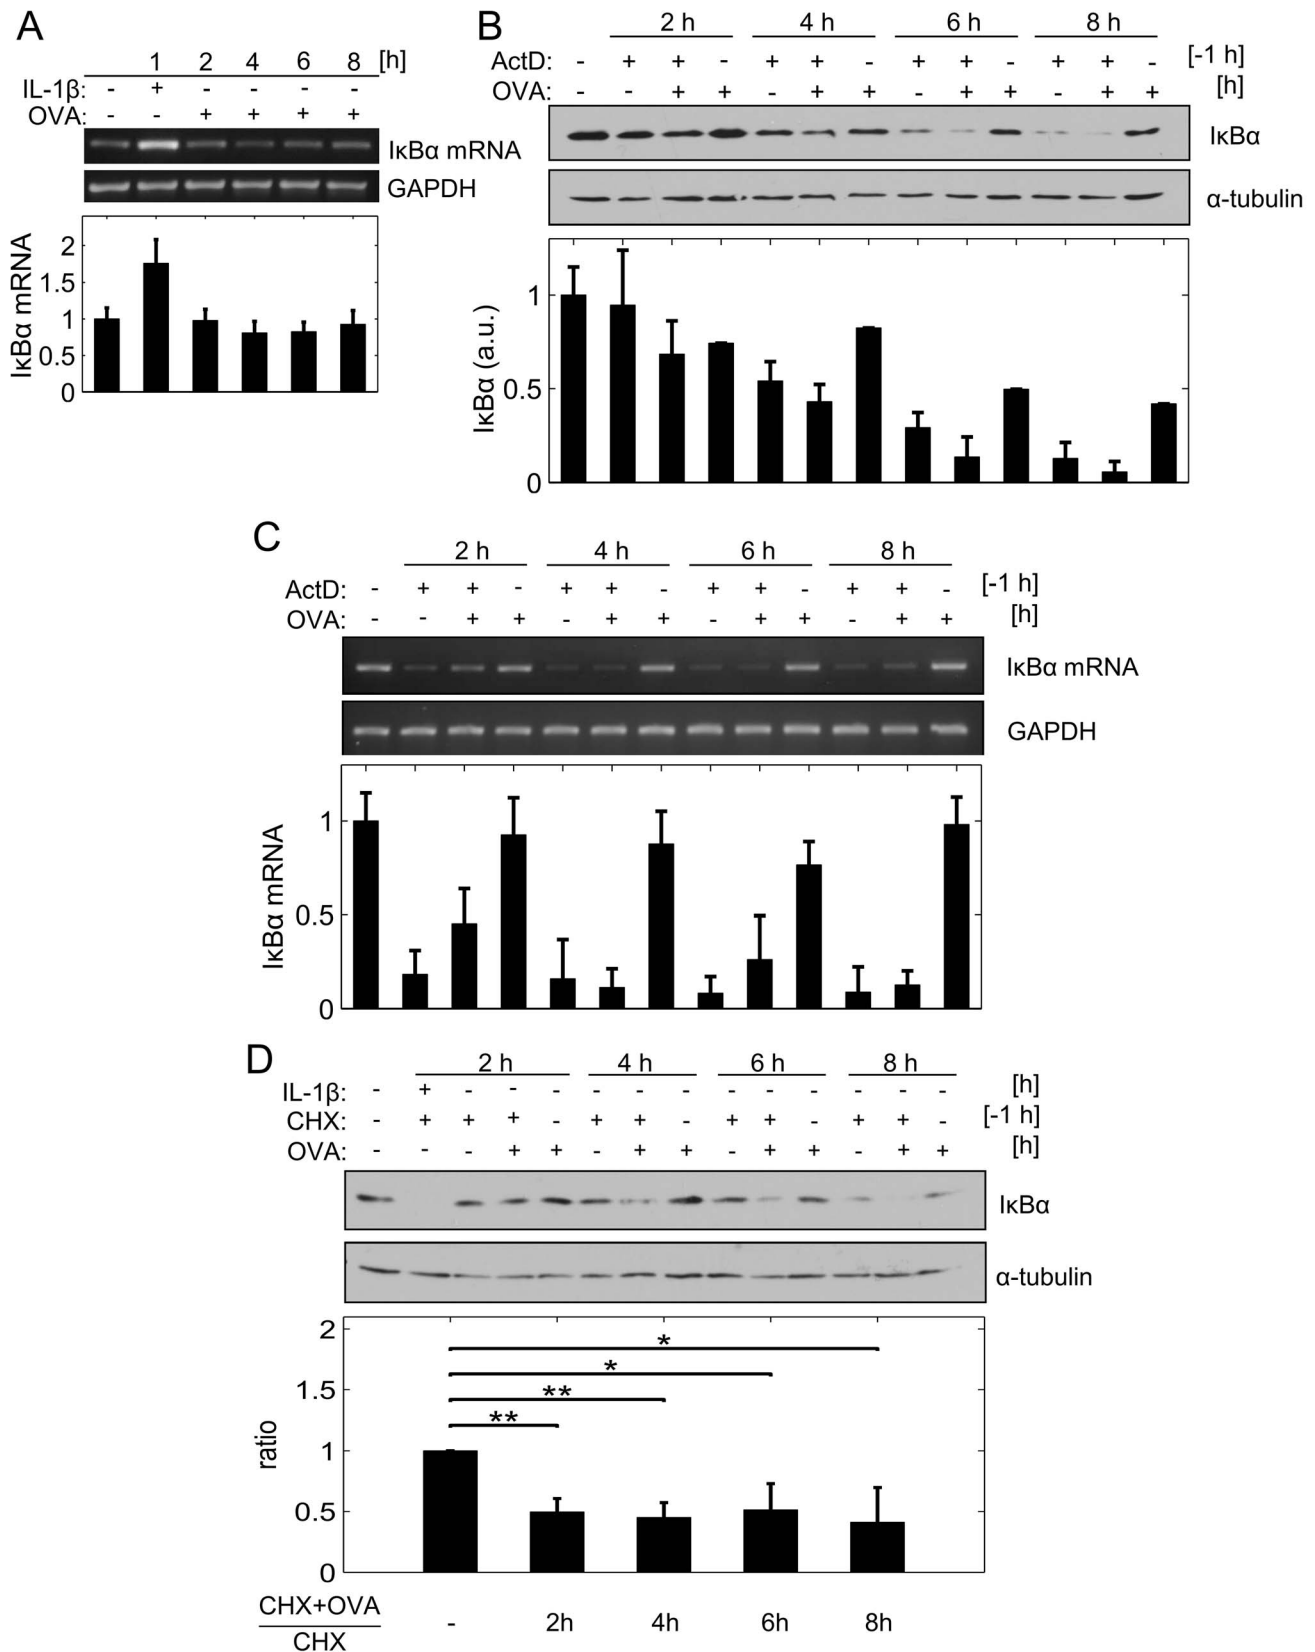

**Figure 2. OVA-dependent IκBα depletion is mediated at the post-translational but not at the transcriptional level.** **A:** Cells were left untreated, stimulated with IL-1 (10 ng/ml) or OVA (1 mM). At the indicated time points transcriptional regulation of IκBα was monitored by RT-PCR, with GAPDH serving as a loading control. **B:** Cells were pre-treated or not with ActD (5 μg/ml) for 1 h and subsequently stimulated or not with OVA (1 mM) as indicated. Protein level of IκBα was determined by Western-blot analysis with α-tubulin as loading control, and **C:** transcription level of

I $\kappa$ B $\alpha$  by RT-PCR with GAPDH as loading control. **D:** Cells were pre-treated or not with CHX (5  $\mu$ g/ml) for 1 h and subsequently stimulated or not with OVA (1 mM) as indicated. Protein level of I $\kappa$ B $\alpha$  was determined by Western-blot analysis with  $\alpha$ -tubulin serving as a loading control, \*\* $p < 0.005$ ; \* $p < 0.05$ .

doi:10.1371/journal.pcbi.1003528.g002

It is known that free as well as NF $\kappa$ B-bound I $\kappa$ B $\alpha$  can be degraded by proteases in a proteasome- as well as in a lysosome-independent manner [20,21]. To monitor the role of OVA within the entire NF $\kappa$ B signaling network, we also included OVA-dependent Src phosphorylation - which subsequently leads to inactivation of PP2A and chronic IKK $\beta$  activation - into the model. This part of the signaling pathway, however, exclusively plays a role at early time points during IL-1 dependent canonical I $\kappa$ B $\alpha$  degradation [18]. Successful parameter fitting was performed based on a huge variety of experimental data comprising multiple stimulations: OVA-, ActD-, ActD+OVA, CHX+OVA-stimulation (Fig. 1–3), IL-1 + OVA-stimulation [18], as well as data describing I $\kappa$ B $\alpha$

depletion upon IL-1-, UVB-, IL-1+UVB-, CHX-, IL-1+UVB+MG132-stimulation collected before [15,19]. All experimental data could be fitted well (Fig. S1). In particular, the good reproducibility of OVA experiments indicated that addition of an I $\kappa$ B $\alpha$ -degrading protease is sufficient to reproduce OVA-induced I $\kappa$ B $\alpha$  depletion without activating NF $\kappa$ B. The model thereby predicted a pool of free I $\kappa$ B $\alpha$  which is eliminated by a putatively OVA-activated protease, but leaves NF $\kappa$ B-bound I $\kappa$ B $\alpha$  almost unaffected. In the best fit scenario of knock down simulation studies depletion of free I $\kappa$ B $\alpha$  showed major relevance while the depletion of NF $\kappa$ B bound I $\kappa$ B $\alpha$  is negligible (Fig. 4B). Of note, OVA-induced PP2A inactivation is only important in IL-1

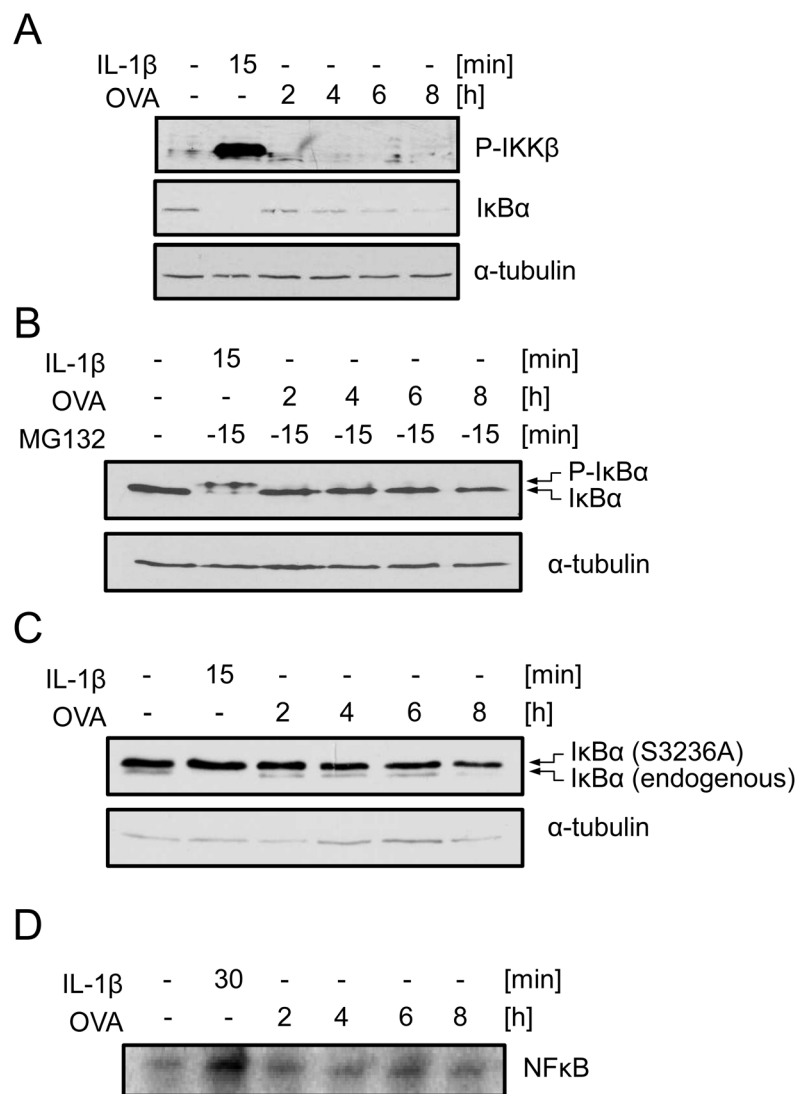

**Figure 3. OVA-induced I $\kappa$ B $\alpha$  depletion does not follow the canonical NF $\kappa$ B activation pattern.** **A:** Cells were stimulated with IL-1 (10 ng/ml) or OVA (1 mM) for the indicated time points. Status of p-IKK $\beta$  and I $\kappa$ B $\alpha$  was determined by Western-blot analysis. **B:** Cells were pretreated with the proteasome inhibitor MG132 for 15 min. Subsequently cells were stimulated as in **A** and the I $\kappa$ B $\alpha$  status determined by Western-blot analysis. **C:** KB cells stably expressing the I $\kappa$ B $\alpha$  super-repressor variant Ser32/36Ala were stimulated as cells in **A**, and the I $\kappa$ B $\alpha$  status determined by Western-blot analysis. **D:** Cells were stimulated as in **A**, nuclear protein extracts were isolated and subjected to EMSA using an NF $\kappa$ B-specific consensus sequence. doi:10.1371/journal.pcbi.1003528.g003

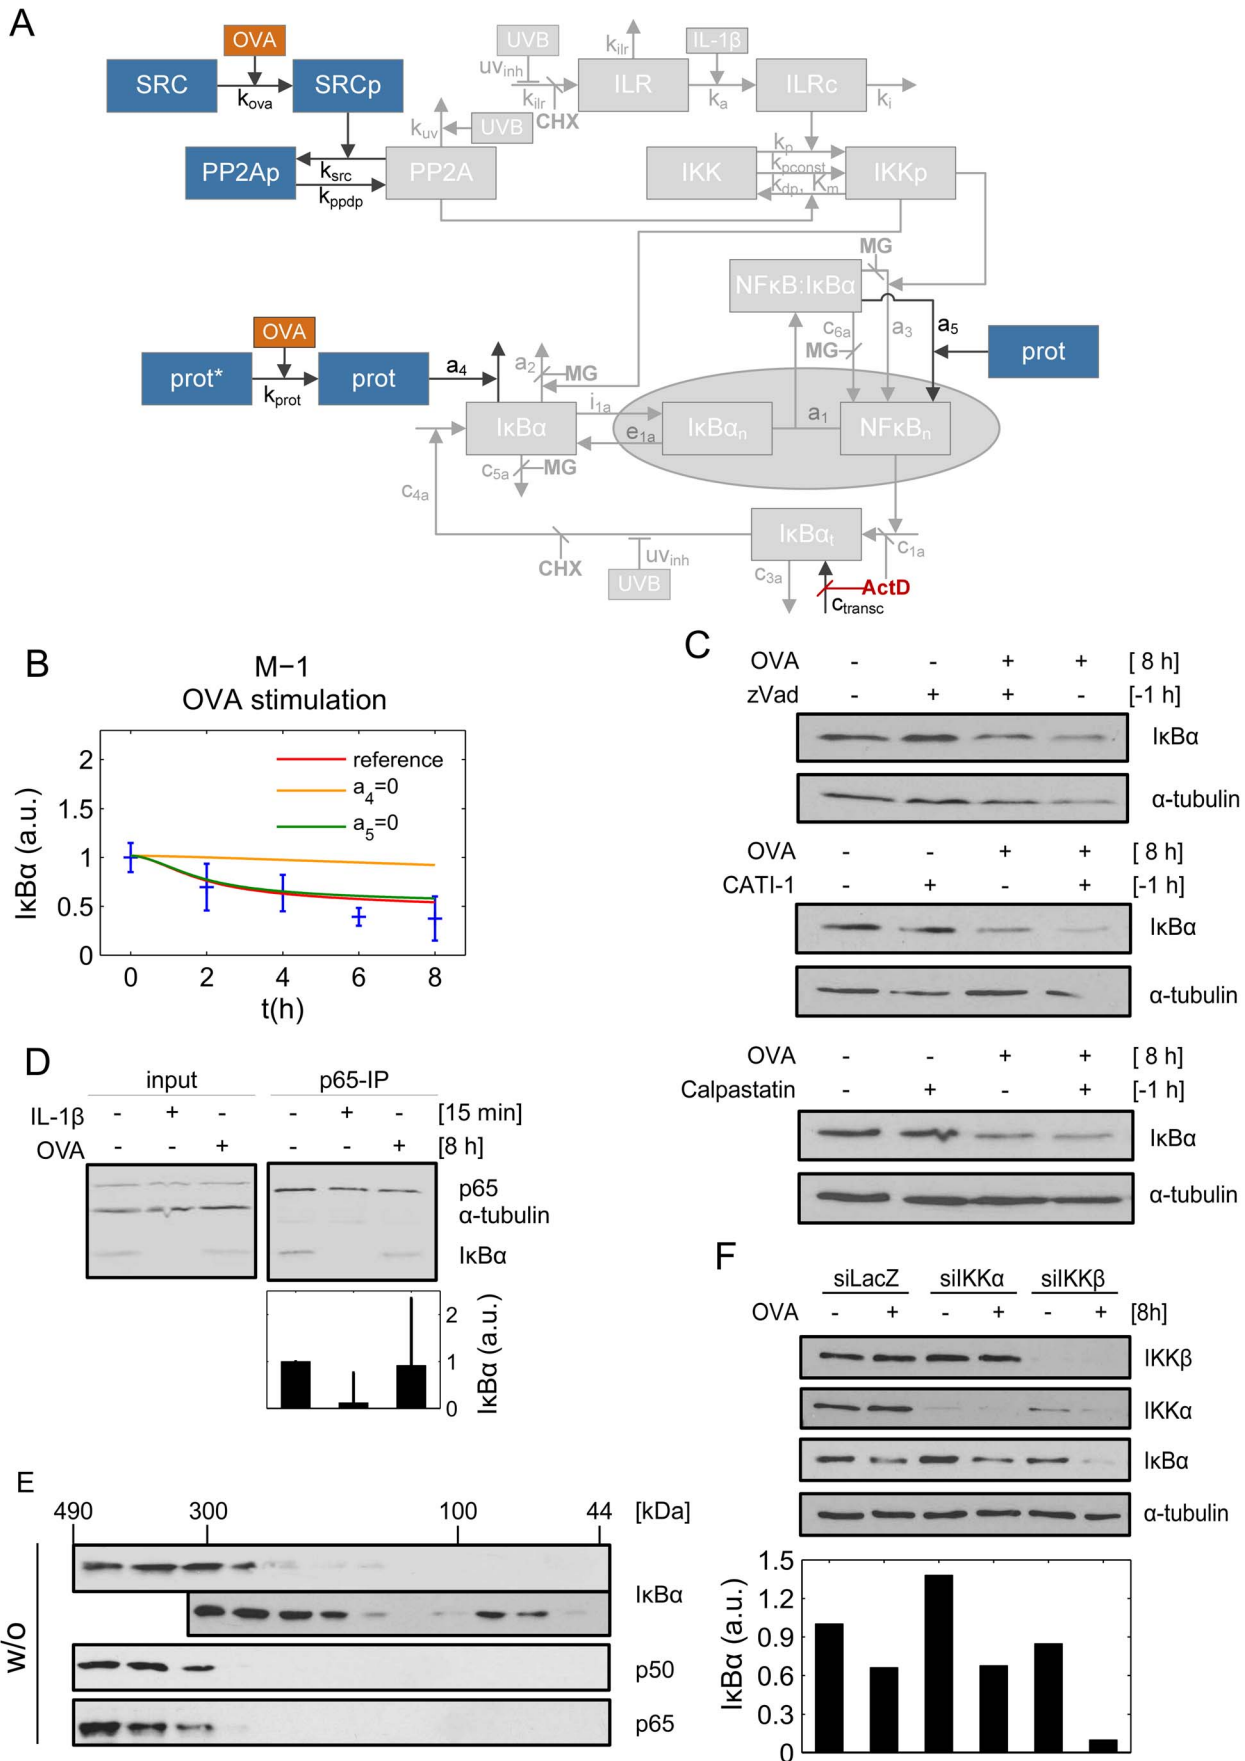

**Figure 4. I $\kappa$ B $\alpha$  co-exists in different cellular complexes.** **A:** Schematic representation of model variant M-1. Input (IL-1, UVB, OVA, MG132 (MG), ActD, CHX) is given in orange and red, respectively. Reactions and variables adopted from our previous model (Witt et al, [15]) are shown in grey. **B:** The red line represents simulation data of the best fit (reference). The impact of protease-mediated degradation of free I $\kappa$ B $\alpha$  is depicted in orange and determined by setting the rate constant of this reaction ( $a_4$ ) to zero. Likewise, the rate constant of protease-mediated degradation of NF $\kappa$ B bound I $\kappa$ B $\alpha$  ( $a_5$ ) was set to zero (green line). Experimental data and standard deviation is shown in blue. **C:** KB cells were left untreated, pre-stimulated with zVAD (20  $\mu$ M), CATI-1 (50  $\mu$ M) or calpastatin (1  $\mu$ M), for 1 h followed by OVA treatment for 8 h. Protein level of I $\kappa$ B $\alpha$  was determined by Western-blot analysis with  $\alpha$ -tubulin serving as a loading control. **D:** Cells were left untreated, stimulated with IL-1 for 15 min or OVA for 8 h. Subsequently protein extracts were subjected to immunoprecipitation with an antibody specific for the p65 subunit of NF $\kappa$ B. The amount of co-precipitated I $\kappa$ B $\alpha$  was determined by Western-blot analysis compared to input protein levels. Bars represent I $\kappa$ B $\alpha$  levels that are normalized to the respective p65 levels. **E:** Lysates from unstimulated cells were subjected to size exclusion chromatography. Individual fractions were analyzed via Western-blotting, using antibodies against I $\kappa$ B $\alpha$ , p65 and p50. **F:** IKK $\alpha$  and IKK $\beta$ , respectively, were transiently knocked down using siRNA, with siLacZ serving as a negative control. Subsequently cells were stimulated with OVA for 8 h and the I $\kappa$ B $\alpha$  status, as well as IKK $\alpha$  and IKK $\beta$  knock down determined by Western-blot analysis.  $\alpha$ -tubulin served as loading control.  
doi:10.1371/journal.pcbi.1003528.g004

stimulated cells and is therefore also irrelevant for OVA only stimulation following a much slower kinetics.

Still, the model predictions had to deal with two obstacles: Firstly, due to its immense instability only a very small pool of free I $\kappa$ B $\alpha$  seems to exist within the cell at all [22]. Secondly, proteolytic cleavage of I $\kappa$ B $\alpha$  at least by three major groups of proteases: caspases, calpains and cathepsins could be excluded by the use of specific inhibitors (Fig. 4C). To follow up the model based hypothesis of a stably existing I $\kappa$ B $\alpha$  form that is not bound to NF $\kappa$ B, we immuno-precipitated the NF $\kappa$ B p65 subunit from whole cell lysates and checked the levels of co-precipitated I $\kappa$ B $\alpha$  in un-stimulated *versus* OVA-treated cells. The amount of I $\kappa$ B $\alpha$  remained largely unchanged, whereas I $\kappa$ B $\alpha$  was absent in cells stimulated with IL-1, due to complete canonical degradation (Fig. 4D). These data strongly supported the assumption that only I $\kappa$ B $\alpha$  which is not bound to NF $\kappa$ B is depleted in an OVA-dependent fashion. To investigate whether depleted I $\kappa$ B $\alpha$  in fact is free or bound to other cellular components but NF $\kappa$ B, we conducted size exclusion chromatography. Indeed, I $\kappa$ B $\alpha$  appeared to exist in at least three different forms in un-stimulated cells. While only a minimal fraction seemed to refer to unbound I $\kappa$ B $\alpha$  eluting at a size of 44 kDa, surprisingly no complex exclusively consisting of I $\kappa$ B $\alpha$  and NF $\kappa$ B (p65:p50) seemed to exist. Instead, complexes of higher molecular weight containing I $\kappa$ B $\alpha$ , p65 and p50 (NF $\kappa$ B) showed up at sizes ranging between 300 kDa and 490 kDa, indicating to incorporate other proteins as well. In addition, different aggregates ranging between 100 kDa and 300 kDa in size appeared which did not contain any NF $\kappa$ B components, implying I $\kappa$ B $\alpha$  to also form complexes with other proteins (Fig. 4E). To investigate whether IKKs might be involved in stabilizing I $\kappa$ B $\alpha$  we knocked down the two catalytic subunits IKK $\alpha$  and IKK $\beta$  by RNA interference. While IKK $\alpha$  knock down had no effect on I $\kappa$ B $\alpha$  depletion, knock down of IKK $\beta$  seemed to enhance loss of I $\kappa$ B $\alpha$ , implying that binding to IKK $\beta$  stabilizes I $\kappa$ B $\alpha$  which is not bound to NF $\kappa$ B (Fig. 4F). The fact that model variant M-1, and a simple extension by adding a second (competing) I $\kappa$ B $\alpha$  complex formation (variant M-2, Fig. S3), respectively, could not fully explain the IKK knock down data (Fig. S2 and S4) argues for an additional I $\kappa$ B $\alpha$ -IKK interaction and calls for a more in depth analysis of the I $\kappa$ B $\alpha$  complexes.

### Novel cellular I $\kappa$ B $\alpha$ complexes containing IKK components but no NF $\kappa$ B

To stress whether IKK components play a role in I $\kappa$ B $\alpha$  complex formation we first generated model variant M-3 assuming that IKK is permanently bound to I $\kappa$ B $\alpha$  which lacks NF $\kappa$ B (Fig. 5A). According to the chosen model structure, binding of IKK to I $\kappa$ B $\alpha$  results in the formation of an I $\kappa$ B $\alpha$ :IKK as well as an NF $\kappa$ B:I $\kappa$ B $\alpha$ :IKK complex. As phosphorylated IKK (IKK $\rho$ ) initiates degradation of I $\kappa$ B $\alpha$ , the IKK $\rho$  containing complexes

are highly unstable and dissociate into free IKK $\rho$  and free NF $\kappa$ B which translocates into the nucleus.

The simulation results of this model variant revealed a very good reproducibility of all experimental data including the OVA+IKK knock down experiment (Fig. 5B).

When exploring the model predicted steady state levels in the un-stimulated IKK knock down setting (Fig. S5), very low IKK yielded decreased formation of both IKK containing complexes I $\kappa$ B $\alpha$ :IKK and NF $\kappa$ B:I $\kappa$ B $\alpha$ :IKK. As a consequence elevated levels of free and NF $\kappa$ B-bound I $\kappa$ B $\alpha$  (NF $\kappa$ B:I $\kappa$ B $\alpha$ ) were predicted. Consequently, constitutive degradation of NF $\kappa$ B:I $\kappa$ B $\alpha$  results in enhanced NF $\kappa$ B activation and further increased levels of free I $\kappa$ B $\alpha$  (Fig. S5A). Starting from these changed steady state levels in the IKK knock down setting - especially taking the increased level of free I $\kappa$ B $\alpha$  into account - the OVA-mediated degradation of I $\kappa$ B $\alpha$  could be reproduced accurately (Fig. S6).

In this final model OVA mediated the degradation of an NF $\kappa$ B-free I $\kappa$ B $\alpha$  complex (I $\kappa$ B $\alpha$ :IKK), thus preventing activation of NF $\kappa$ B and I $\kappa$ B $\alpha$  mRNA synthesis (Fig. 5C and Fig. 5D).

In summary, the mathematical model based analysis clearly proposes the existence of IKK containing I $\kappa$ B $\alpha$  complexes lacking NF $\kappa$ B, supporting the hypothesis that IKK $\beta$  stabilizes “unbound” I $\kappa$ B $\alpha$ . Size exclusion chromatography clearly revealed that the high molecular weight complexes (300–490 kDa) in un-stimulated cells consisted of at least I $\kappa$ B $\alpha$ , NF $\kappa$ B (p65:p50), and all three IKK components IKK $\alpha$ , IKK $\beta$  and IKK $\gamma$ . Most importantly, IKK $\gamma$  eluted together with I $\kappa$ B $\alpha$  at 100 kDa, perfectly matching the size of a heterodimeric complex ( $\pm$ 94 kDa). Of note, additional complexes containing exclusively IKK $\beta$  and IKK $\gamma$  ( $\pm$ 140 kDa) but not IKK $\alpha$  appeared to be formed (Fig. 5E).

Treatment with OVA for 8 h did not significantly change the composition of the high molecular weight complexes. In contrast, it caused pronounced depletion of I $\kappa$ B $\alpha$  from the I $\kappa$ B $\alpha$ :IKK $\gamma$  complex, while IKK $\gamma$  seems to randomly distribute over numerous fractions. This clearly indicates dissociation of this heterodimeric I $\kappa$ B $\alpha$ :IKK $\gamma$  complex to precede I $\kappa$ B $\alpha$  depletion (Fig. 5F). The existence of an NF $\kappa$ B-lacking I $\kappa$ B $\alpha$ :IKK $\gamma$  complex as well as the specific depletion of I $\kappa$ B $\alpha$  from this particular complex following OVA treatment was confirmed by co-immunoprecipitation. While in unstimulated cells reasonable amounts of I $\kappa$ B $\alpha$  but no NF $\kappa$ B were shown to bind to IKK $\gamma$ , the level of I $\kappa$ B $\alpha$  decreased significantly upon treatment of cells with OVA for 8 h. No I $\kappa$ B $\alpha$  was found bound to IKK $\gamma$  in IL-1 stimulated cells, due to complete canonical degradation (Fig. 5G). This is perfectly in line with simulation results derived from the final model variant M-3 suggesting that degradation of NF $\kappa$ B-free but IKK-bound I $\kappa$ B $\alpha$  is responsible for the partial I $\kappa$ B $\alpha$  depletion in response to OVA.

To assess the functional relevance under physiological conditions, we investigated I $\kappa$ B $\alpha$  depletion in response to stimuli being capable to induce both, NF $\kappa$ B activation and apoptotic cell death

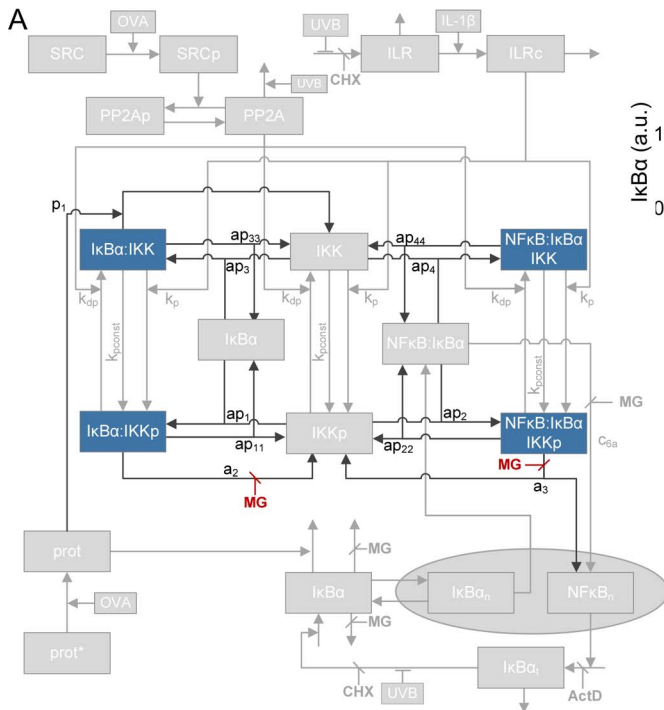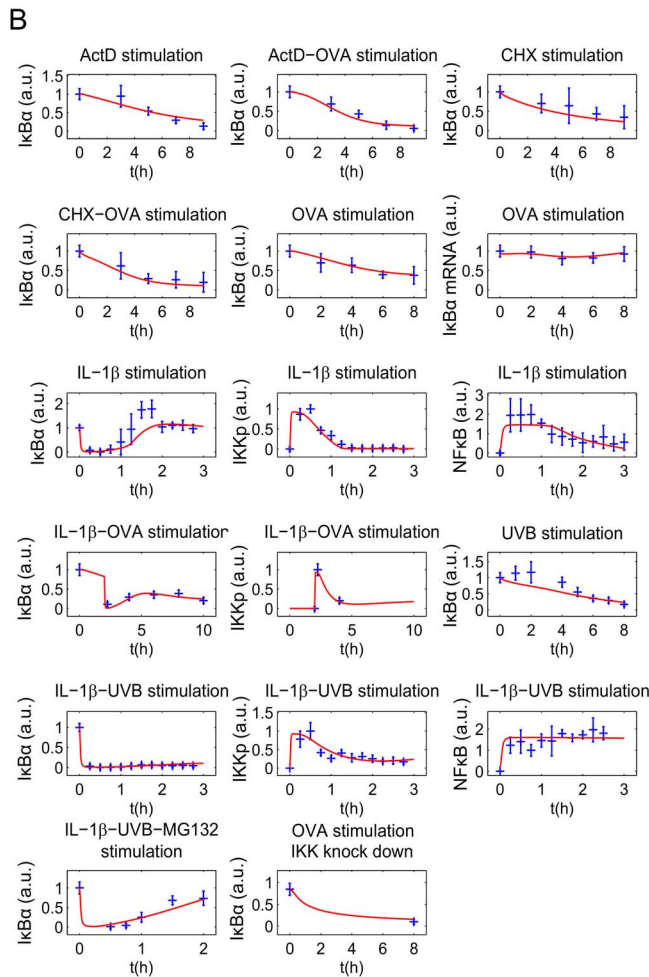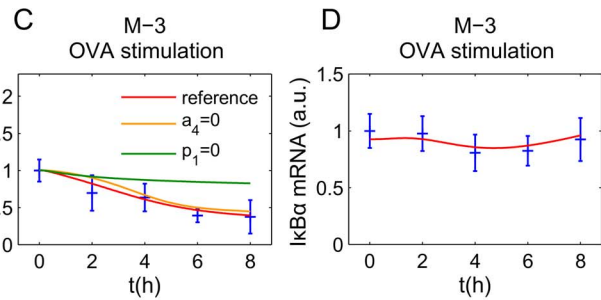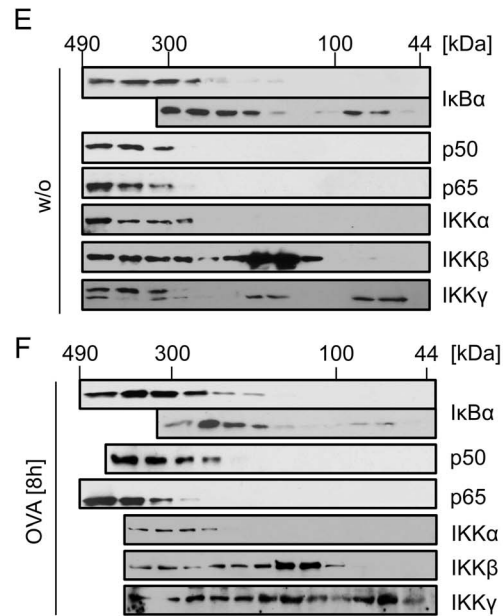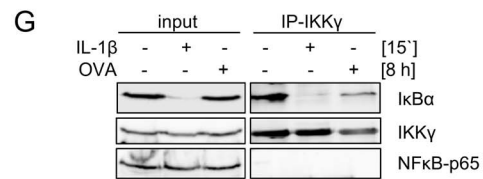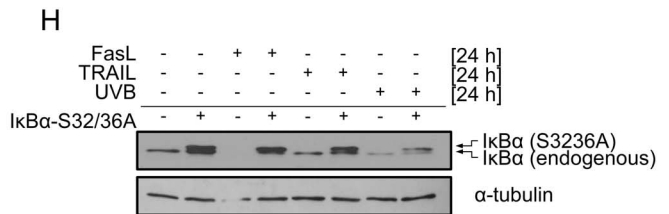



**Figure 5. NF $\kappa$ B free I $\kappa$ B $\alpha$  complexes contain subunits of the IKK complex. A:** Schematic representation of model M-3 (final model). State variables are depicted in blue, inputs (IL-1, UVB, OVA, MG132 (MG), ActD, CHX) in orange and red, respectively. Reactions and variables adopted from our previous model (Witt et al, [15]) or model variant M-1 or M-2 are shown in grey. **B:** Overall simulation results of the best fit. The 127 data points and standard deviations are depicted in blue, the red line represents simulated time course of the respective state variable. The overall  $\chi^2$  value is 100.6. **C:** Reference (red line) represents simulation data of the best fit. Setting the rate constant of protease-mediated degradation of free I $\kappa$ B $\alpha$  ( $a_d$ ) to zero reveals the impact of this reaction on observed I $\kappa$ B $\alpha$  degradation (orange). The impact of protease-mediated degradation of IKK bound I $\kappa$ B $\alpha$  ( $p_1$ ) is depicted in green. **D:** Simulated time course of the I $\kappa$ B $\alpha$  mRNA level after 8 h of OVA treatment is depicted in red. Corresponding experimental data and standard deviation is shown in blue. Lysates from **E:** unstimulated or **F:** OVA treated cells were subjected to size exclusion chromatography. Individual fractions were analyzed by Western-blotting, using antibodies against I $\kappa$ B $\alpha$ , p65 and p50, IKK $\alpha$ , IKK $\beta$  and IKK $\gamma$ . **G:** Cells were left untreated, stimulated with IL-1 for 15 min or OVA for 8 h. Subsequently IKK $\gamma$  was immunoprecipitated from protein extracts and the amount of co-precipitated NF $\kappa$ B (p65) and I $\kappa$ B $\alpha$  determined by Western-blot analysis compared to input protein levels. **H:** KB cells stably expressing the I $\kappa$ B $\alpha$  super-repressor variant Ser32/36Ala were stimulated as indicated. After 24 h cellular I $\kappa$ B $\alpha$  status was monitored by Western-blot analysis with  $\alpha$ -tubulin serving as a loading control.

doi:10.1371/journal.pcbi.1003528.g005

[23,24]. Treatment with the death ligands TRAIL and FasL, respectively, exclusively caused canonical I $\kappa$ B $\alpha$  degradation, being indicative by sparing the I $\kappa$ B $\alpha$  super-repressor variant from depletion. In contrast, irradiation of cells with UVB additionally resulted in I $\kappa$ B $\alpha$  depletion independent of the canonical pathway – represented by degradation of both, the endogenous and the super-repressor variant (Fig. 5H). These data strongly support the notion that other but canonical pathways exist that may affect the status of I $\kappa$ B $\alpha$  within the cell. Thus, we have uncovered an additional I $\kappa$ B $\alpha$  complex to exist in un-stimulated cells that might serve as storage to antagonize random or undesired NF $\kappa$ B activation and consequently ensures proper cellular function.

## Discussion

In the past decades activation of NF $\kappa$ B has exclusively been attributed to either canonical or non-canonical signal transduction pathways. Both pathways are tightly regulated by a series of phosphorylation and ubiquitination events that cause nuclear translocation of distinct NF $\kappa$ B family members. Canonical signal transduction basically accumulates at two well described protein complexes, namely IKK and NF $\kappa$ B:I $\kappa$ B $\alpha$ . Accordingly, stimulation of cells with the pro-inflammatory cytokine IL-1 causes downstream activation of the IKK complex, in particular the catalytic subunit IKK $\beta$ , to mark I $\kappa$ B $\alpha$  for proteasomal degradation. Released NF $\kappa$ B in turn triggers resynthesis of its inhibitor in a negative regulatory feedback loop. Most recently, a number of ubiquitin ligases including TRAF molecules and the lubac complex have additionally been implemented in canonical NF $\kappa$ B activation [25,26], while de-ubiquitinases like A20 and CYLD serve a well-known function in negative feedback regulation [27,28]. In the present study we provide evidence that besides the well-known components of canonical NF $\kappa$ B signaling, alternative I $\kappa$ B $\alpha$  containing complexes exist within the cell that might indirectly contribute to NF $\kappa$ B regulation. Short term inhibition of I $\kappa$ B $\alpha$  resynthesis following IL-1+UVB and IL-1+OVA treatment, respectively, is due to abrogation of canonical negative feedback regulation via inhibition of PP2A leading to chronic IKK $\beta$  activation [3,19]. At later time points, however, canonical feedback regulation seems to be superimposed by an IKK $\beta$ -independent OVA-driven mechanism that follows a slower kinetics and only causes partial I $\kappa$ B $\alpha$  depletion. A similar observation could previously be made in UVB-irradiated cells, showing slow and subtotal I $\kappa$ B $\alpha$  depletion resulting in only moderate and delayed NF $\kappa$ B activation [3]. In the present study OVA-induced delayed I $\kappa$ B $\alpha$  depletion appeared to follow a pattern different from canonical NF $\kappa$ B activation, because super-repressor variants of I $\kappa$ B $\alpha$  could be depleted as well. This implies I $\kappa$ B $\alpha$  depletion which does not follow the canonical pattern to serve an important, yet unknown function. Although a number of alternative ways to proteolytically cleave I $\kappa$ B $\alpha$  have been

described in the literature [20,21,29,30] inhibition of the major cellular protease families, could be ruled out. More recently an alternative proteasome independent mechanism called PIR has been described to enhance I $\kappa$ B $\alpha$  turnover in B-cells, however, PIR resulted in constitutive p50:cRel activation in those cells and may therefore play a different role [21,31]. Still, integration of an OVA-activated protease into all our mathematical models that is able to deplete I $\kappa$ B $\alpha$ - different from the canonical mechanism - was shown to nicely reproduce the OVA induced I $\kappa$ B $\alpha$  degradation with slow activation kinetics determined by a small rate constant (M-3:  $k_{prot} = 3.76e^{-7} s^{-1}$ , Table S1). Accordingly, significant degradation of I $\kappa$ B $\alpha$  occurs at later time points (4 h–8 h) and may involve PIR-like mechanisms.

Reproducing OVA-induced I $\kappa$ B $\alpha$  depletion without NF $\kappa$ B activation in model variant M-1 predicted high levels, 31%, of free I $\kappa$ B $\alpha$  (0.041  $\mu$ M out of 0.135  $\mu$ M) to exist within the cell (Table S2), whereas only 10% to 15% of free I $\kappa$ B $\alpha$  is supposed to exist [32,33]. Remarkably, inclusion of putative NF $\kappa$ B-lacking I $\kappa$ B $\alpha$  complexes nicely scaled down the level of free I $\kappa$ B $\alpha$  to 13% (M-2) and 8% (M-3) respectively which now is in very good accordance to the literature values, matches mathematical models of other groups [11,22,34], and could also be verified by size exclusion chromatography.

According to previous studies that revealed IKK $\alpha$  and IKK $\beta$  to form high molecular complexes that contain I $\kappa$ B $\alpha$  as well as NF $\kappa$ B components [35,36] model variant M-3 predicted I $\kappa$ B $\alpha$  to form both, stable I $\kappa$ B $\alpha$ :IKK as well as NF $\kappa$ B:I $\kappa$ B $\alpha$ :IKK complexes. With this final model the entire data of numerous experiments could be reproduced with a good fit quality. Finally formation of an I $\kappa$ B $\alpha$ :IKK $\gamma$  complex could be verified experimentally by gel filtration analysis as well as co-immunoprecipitation. Expanding the scope of our previous model [15] by iterative model refinement revealed new insights into NF $\kappa$ B regulation and allowed to analyze the effect of an *in silico* knock down of the IKK complex on the OVA-mediated I $\kappa$ B $\alpha$  depletion. The model predicts that knocking down IKK $\beta$  enhances the level of an I $\kappa$ B $\alpha$  compound that can be degraded by the proposed protease. *In vitro* neither I $\kappa$ B $\alpha$  from the high molecular complex nor IKK $\beta$ :IKK $\gamma$  bound I $\kappa$ B $\alpha$  seems to be depleted after OVA treatment. Thus knocking down IKK $\beta$  could result in decreased levels of NF $\kappa$ B:I $\kappa$ B $\alpha$ :IKK as well as I $\kappa$ B $\alpha$ :IKK $\beta$ :IKK $\gamma$  and an elevated concentration of the I $\kappa$ B $\alpha$ :IKK $\gamma$  complex. Due to larger amounts of I $\kappa$ B $\alpha$ :IKK $\gamma$ , OVA-mediated degradation of this I $\kappa$ B $\alpha$  component would explain why IKK $\beta$  knock down enhances OVA-induced I $\kappa$ B $\alpha$  depletion. Additionally, a constant basic IKK $\beta$ -mediated I $\kappa$ B $\alpha$  turnover exists in unstimulated cells [19], yielding in continuous NF $\kappa$ B-dependent resynthesis of I $\kappa$ B $\alpha$ . In case of IKK $\beta$  knock down, this process is completely abrogated consequently causing subtle loss of I $\kappa$ B $\alpha$  over time exclusively dependent on the individual half life in treated versus untreated cells (see also Fig. 4F).

Combining experimental methods and detailed dynamical modeling we could provide strong evidence for the existence of an NF $\kappa$ B-free, IKK $\gamma$  containing I $\kappa$ B $\alpha$  complex presumably acting as a cellular backup pool to capture randomly released NF $\kappa$ B. Above this, our model introduces an I $\kappa$ B $\alpha$  degradation pathway that is independent from canonical processes but is likely to influence the cellular status of I $\kappa$ B $\alpha$ . Our final mathematical model (M-3) created here is able to reproduce a huge number of datasets comprising various intracellular proteins and a wide range of stimulation experiments to extensively reflect on the whole NF $\kappa$ B signaling network above individual top-down signaling pathways. Thus, our model can be used for further modeling approaches regarding NF $\kappa$ B regulation and may provide predictive potential for sensitive parameters that may serve as therapeutic targets in the future.

## Materials and Methods

### Cells and reagents

The human epithelial carcinoma cell line KB (ATCC) was cultured in RPMI 1640, 10% FCS. Recombinant human IL-1 $\beta$  (R&D Systems, Wiesbaden, Germany) was applied at 10 ng/ml and Na-Orthovanadate (Sigma, Munich, Germany) at 1 mM. Actinomycin D and cycloheximide (Sigma) were added to cells at 5  $\mu$ g/ml, respectively. Specific protease inhibitors (Calbiochem, Darmstadt, Germany) were applied at 50  $\mu$ M for the cathepsin inhibitor CATI-1, 1  $\mu$ M for calpastatin and 20  $\mu$ M for the pan caspase inhibitor zVAD. Proteasomal inhibition was achieved by addition of 25  $\mu$ M MG132 (Calbiochem). For Fas/CD95 receptor activation 0.5  $\mu$ g/ml of an agonistic antibody (Immunotech, Monrovia, CA, USA) was used. Recombinant human iz-TRAIL protein, N-terminally fused to an isoleucine-zipper motif in order to constitutively build the trimerized active form [37] was kindly provided by Dr. Henning Walczak, Centre for Cell Death, Cancer and Inflammation, UCL, London and added at 100 ng/ml. UVB irradiation (300 J/m<sup>2</sup>) was performed with TL12 fluorescent bulbs (290–320 nm, Philips).

### Immunoprecipitation and WB analysis

Cells were lysed in lysis buffer (50 mM Hepes, pH 7.5; 150 mM NaCl; 10% glycerol; 1% Triton-X-100; 1.5 mM MgCl<sub>2</sub>; 1 mM EGTA; 100 mM NaF; 10 mM pyrophosphate, 0.01% NaN<sub>3</sub> and Complete protease inhibitor cocktail; Roche, Mannheim, Germany) for 20 min on ice. Endogenous NF $\kappa$ B (p65) or IKK $\gamma$  were immune-precipitated using specific antibodies (sc-372; sc-8330 Santa Cruz, Heidelberg, Germany) and A/G-plus agarose (Santa Cruz) over night. Precipitates were analyzed by Western-blotting using antibodies against NF $\kappa$ B (F6, sc-8008, Santa Cruz), I $\kappa$ B $\alpha$  (L35A5, Cell Signalling, Beverly, MA, USA) and IKK $\gamma$  (IMG-324A, Imgenex, San Diego, CA, USA). For WB analysis cells were lysed by addition of hot (95°C) Laemmli buffer. 80  $\mu$ g protein extracts were subjected to SDS-PAGE and Western-blot analyses using antibodies against I $\kappa$ B $\alpha$ , P-IKK $\beta$ -Ser177/181, IKK $\beta$ , p50 (L35A5, 16A6, 2C8, #3035, Cell Signalling), p65 (sc-8008, Santa Cruz), IKK $\alpha$  (556532, BD Biosciences), IKK $\gamma$  (IMG-324A Imgenex, San Diego, CA, USA), and  $\alpha$ -tubulin (DM1A, Neomarkers, Fremont, CA, USA), using West-Pico or West-Dura (Pierce, Thermo Scientific, Rockford, IL, USA) chemiluminescent substrates.

### Semiquantitative RT-PCR analysis

Total RNA was extracted from cells using GIT-buffer (4 M guanidinthiocyanate, pH 4.8; 0.3 M NaOAc; 1% N-lauroylsarcosine; 0.2%  $\beta$ -mercaptoethanol) followed by phenol/chloroform

extraction utilizing Phase Lock Heavy tubes (Eppendorf AG, Hamburg, Germany). Six  $\mu$ g of total RNA was reverse transcribed with an AMV Reverse Transcriptase kit (Promega, Mannheim, Germany). The following primers were used in a 20  $\mu$ l reaction utilizing the RedTaq polymerase system (Sigma):

GAPDH:

F: 5'-GCCTCCTGCACCACCAACTGC-3'; R: 5'-CCCT-CCGACGCCTGCTTCAC-3'

I $\kappa$ B $\alpha$ :

F: 5'-ACAGGAATTACAGGGTGCAGG-3'; R: 5'-GAGA-AACTCCCTGCGATGAG-3'

### Plasmids and transfection of cells

For ectopic expression of I $\kappa$ B $\alpha$  -S32/36A 6,5 $\times$ 10<sup>6</sup> cells were transfected with 25  $\mu$ g of the respective pcDNA3.1-based construct by electroporation at 1200  $\mu$ F and 250 V (Easyjct-Plus, Peqlab, Erlangen, Germany) in ice cold RPMI medium w/o FCS. Transfection efficacy ranged between 70 and 80%.

### RNA interference

1 $\times$ 10<sup>5</sup> cells were transfected with 0.5 pmol/ $\mu$ l siRNA knocking down IKK $\alpha$ : GCAGAAGAUUUAUUGAUCUATT or IKK $\beta$ : UUCAGAGCUUCGAGAAGAATT (Eurofins MWG, Ebersberg, Germany) using Lipofectamin 2000 (Life Technologies, Darmstadt, Germany) according to the protocol. Cells were analyzed after 72 h.

### Electro mobility shift assay (EMSA)

Following stimulation cells were harvested and nuclear proteins extracted as described before [38]. The NF $\kappa$ B consensus oligo nucleotide (sc-2505; Santa Cruz) was end-labeled using [ $\gamma$ -<sup>32</sup>P] ATP and T4 polynucleotide kinase (MBI Fermentas, Ontario, Canada), followed by column-purification (QIAquick Nucleotide Removal Kit, Qiagen, Hilden, Germany). Binding reactions were carried out in a 20  $\mu$ l volume containing 8  $\mu$ g nuclear protein extract in 5 $\times$  binding buffer (20 mM HEPES, pH 7.5; 50 mM KCl; 2.5 mM MgCl<sub>2</sub>; 20% (w/v) ficoll; 1 mM DTT), containing 1  $\mu$ g poly[dIdC]; 2  $\mu$ g BSA, and 70.000 cpm of <sup>32</sup>P-labeled NF $\kappa$ B consensus oligo nucleotide for 20 min at RT. Samples were separated on a 4% native PAGE at 150 V for 2.5 h and detected by autoradiography.

### Size exclusion chromatography (FPLC)

Cells were harvested in PBS+0.01% sodium acid and disrupted by sonication. 10 mg protein extract was fractionated on an agarose bead column (GE, Healthcare, Frankfurt, Germany). Fractionated proteins were precipitated in 50% TCA, washed twice with acetone and applied to SDS-PAGE and subsequent Western-Blot analysis. Proteins of known size (thyroglobulin: 670 kDa,  $\gamma$ -globulin: 158 kDa, ovalbumin: 44 kDa, myoglobin: 17 kDa, cobalamin: 1.3 kDa) were used as a standard.

### Data processing

Western-Blots analyses are presented as mean  $\pm$  SD of 3 independently performed experiments. Blots were evaluated densitometrically and the results normalized to the maximal measured value. A minimal relative standard deviation of 15% was always assumed. For statistical analysis student's t-test was performed.

### Mathematical modelling

The mathematical models created in this study are based on our previous ODE model [15] comprising the following components:

IL-1-receptor (IL-1R), IL-1-receptor ligand complex (ILRc), free IκBα (IκBα), NFκB bound IκBα (NFκB:IκBα), nuclear IκBα (IκBα<sub>n</sub>), nuclear NFκB (NFκB<sub>n</sub>), IκBα mRNA (IκBα<sub>i</sub>), IKKβ (IKK), phosphorylated IKKβ (IKKp), Protein phosphatase 2A (PP2A).

In our recent models IKK (and IKKp) is perceived as the IKK complex consisting of IKKα, IKKβ and IKKγ instead of IKKβ alone.

First of all we extended the basic model [15] by our previously proposed mechanism of OVA prolonging the IL-1 mediated activity of NFκB [18]. OVA treatment causes phosphorylation of the tyrosine kinase cSrc which in turn phosphorylates and thereby inactivates PP2A:

$$\begin{aligned} \frac{d}{dt}SRCp(t) &= k_{ova} \cdot (1 - SRCp(t)) \cdot ova(t) \\ \frac{d}{dt}PP2A(t) &= -k_{uv} \cdot uv(t) \cdot PP2A(t) \\ &\quad - k_{src} \cdot PP2A(t) \cdot SRCp(t) + k_{ppdp} \cdot PP2Ap(t) \\ \frac{d}{dt}PP2Ap(t) &= k_{src} \cdot PP2A(t) \cdot SRCp(t) - k_{ppdp} \cdot PP2Ap(t) \end{aligned}$$

Terms adopted from the model of Witt et al. [15] are highlighted in bold font. PP2Ap represents phosphorylated PP2A. Without loss of generality the total amount of the kinase cSrc (SRC) can be assumed to be 1 (cf. an analogous reasoning for IKK in [19]). Considering mass conservation, ( $1 - SRCp(t)$ ) then represents the Src kinase in its inactive (un-phosphorylated) state. The stimulus OVA is represented by the step function  $ova(t)$  having a value of 0 (absent) or 1 (present). The initial concentration of PP2A is set to 1 whereas PP2Ap is set to zero. In order to reach steady state conditions we started stimulation from steady state established after 240 hours of simulation of the un-stimulated system.

Based on our recent results we assumed for the observed OVA mediated IκBα degradation the involvement of a protease *prot* that is activated by OVA. This assumption is included in all of our model variants by adding the following term:

$$\frac{d}{dt}prot(t) = k_{prot} \cdot (1 - prot(t)) \cdot ova(t)$$

In this equation *prot* represents the active form of the assumed protease and ( $1 - prot(t)$ ) the inactive state considering mass conservation. The total amount of *prot* is assumed to be 1 without loss of generality. In model variant M-1 this protease is able to degrade free and NFκB bound IκBα:

$$\begin{aligned} \frac{d}{dt}IκBα(t) &= -a_2 \cdot (1 - mg(t)) \cdot IKKp(t) \cdot IκBα(t) \\ &\quad + c_{4a} \cdot (1 - chx(t)) \cdot (1 - uv(t) \cdot uvinh) \cdot IκBα_i(t) \\ &\quad - c_{5a} \cdot (1 - mg(t)) \cdot IκBα(t) - i_{1a} \cdot IκBα(t) \\ &\quad + e_{1a} \cdot IκBα_n(t) - a_4 \cdot prot(t) \cdot IκBα(t) \end{aligned}$$

$$\begin{aligned} \frac{d}{dt}NFκB/IκBα(t) &= -a_3 \cdot (1 - mg(t)) \cdot IKKp(t) \cdot NFκB/IκBα(t) \\ &\quad + (a_1 \cdot IκBα_n(t) \cdot NFκB_n(t)) \cdot \frac{1}{k_v} \\ &\quad - c_{6a} \cdot (1 - mg(t)) \cdot NFκB/IκBα(t) \\ &\quad - a_5 \cdot prot(t) \cdot NFκB/IκBα(t) \end{aligned}$$

Degradation of NFκB bound IκBα by the protease in model variant M-1 causes translocation of NFκB into the nucleus followed by the initiation of IκBα mRNA synthesis:

$$\begin{aligned} \frac{d}{dt}NFκB_n(t) &= k_v \cdot a_3 \cdot (1 - mg(t)) \cdot IKKp(t) \cdot NFκB/IκBα(t) \\ &\quad - a_1 \cdot IκBα_n(t) \cdot NFκB_n(t) \\ &\quad + k_v \cdot c_{6a} \cdot (1 - mg(t)) \cdot NFκB/IκBα(t) \\ &\quad + k_v \cdot a_5 \cdot prot(t) \cdot NFκB/IκBα(t) \\ \frac{d}{dt}IκBα_i(t) &= (c_{1a} \cdot NFκB_n(t) + c_{transc}) \cdot (1 - ActD(t)) - c_{3a} \cdot IκBα_i(t) \end{aligned}$$

The factor  $k_v$  is used to compensate the different volumes of cytosol and nucleus (see Witt et al. [15]).

$ActD(t)$  represents a step function of the inhibitor of transcription actinomycin D (ActD) with a value of 1 (present) or 0 (absent).

RNA polymerase II and basal transcription factors are known to be essential for transcription of genes [39,40] whereas specific transcription factors function as enhancer or repressor. Thus we assumed in M-1 and M-2 a constitutive transcription rate for IκBα mRNA synthesis ( $c_{transc}$ ) that is independent of NFκB and is also included in the NFκB model of Hoffmann et al. [9].

Model variant M-1 was fitted to time courses of NFκB, IKKβ -P, IκBα mRNA and/or IκBα respectively gained from the following stimulation experiments:

- IL-1 (IκBα, IKKβ -P, NFκB), IL-1+UVB (IκBα, IKKβ -P, NFκB), IL1+UVB+MG132 (IκBα), UVB (IκBα), cycloheximide (CHX) (IκBα), UVB (IκBα) [15]
- IL-1+OVA (IκBα, IKKβ -P, NFκB) [18]
- ActD (IκBα), ActD+OVA (IκBα), CHX+OVA (IκBα), OVA (IκBα, IκBα mRNA), OVA+IKK knock down (IκBα)

The *in silico* knock down of IKK is realized by adding a factor named *siIKK* to the model variant and setting its value to 0.93 which reduces the initial concentration of IKK to the experimentally determined 7% of IKKβ concentration measured in untreated cells:

$$IKK(0) = (1 - siIKK(t))$$

In all stimulation experiments distinct from the IKKβ knock down experiment the value of *siIKK* is set to zero.

In model variant M-2 we included the proposed IκBα complex *IκBα:Comp*, consisting of IκBα and components *Comp* distinct from NFκB:

$$\begin{aligned} \frac{d}{dt} I\kappa B\alpha / Comp(t) &= ap_1 \cdot I\kappa B\alpha(t) \cdot Comp(t) - ap_{11} \cdot I\kappa B\alpha / Comp(t) \\ &\quad - p_2 \cdot prot(t) \cdot I\kappa B\alpha / Comp(t) \\ &\quad - p_1 \cdot I\kappa B\alpha / Comp(t) \cdot IKKp(t) \cdot (1 - mg(t)) \end{aligned}$$

$$\begin{aligned} \frac{d}{dt} Comp(t) &= -ap_1 \cdot I\kappa B\alpha(t) \cdot Comp(t) + ap_{11} \cdot I\kappa B\alpha / Comp(t) \\ &\quad + p_2 \cdot prot(t) \cdot I\kappa B\alpha / Comp(t) \\ &\quad + p_1 \cdot I\kappa B\alpha / Comp(t) \cdot IKKp(t) \cdot (1 - mg(t)) \end{aligned}$$

In this model variant, the activated protease *prot* additionally degrades IκBα from the IκBα complex, *IκBα:Comp*. Since this complex is part of the measured cellular IκBα concentration in the model, IκBα<sub>obs</sub> becomes:

$$I\kappa B\alpha_{obs} = I\kappa B\alpha(t) + NF\kappa B / I\kappa B\alpha + \frac{I\kappa B\alpha_n(t)}{k_v} + I\kappa B\alpha / Comp(t)$$

The final model, variant M-3, (Fig. 5A) was designed to investigate the possibility of IKK being part of the proposed *IκBα:Comp* complex. We therefore extended model variant M-2 by binding reactions of IκBα and IKK or IKKp and removed the component *IκBα:Comp*. In contrast to M-1 and M-2 we fitted the start concentration of IKK by adding the parameter *IKKstart*:

$$IKK(0) = (1 - siIKK(t)) \cdot IKKstart$$

In addition we assumed that IKK as well as phosphorylated IKK is able to bind IκBα in its free and bound form.

$$\begin{aligned} \frac{d}{dt} I\kappa B\alpha(t) &= -ap_3 \cdot IKK(t) \cdot I\kappa B\alpha(t) - ap_1 \cdot IKKp(t) \cdot I\kappa B\alpha(t) \\ &\quad + ap_{11} \cdot I\kappa B\alpha / IKKp(t) + ap_{33} \cdot I\kappa B\alpha / IKK(t) \\ &\quad + (1 - chx(t)) \cdot (1 - uv(t) \cdot uvinh) \cdot c_{4a} \cdot I\kappa B\alpha_t(t) \\ &\quad - c_{5a} \cdot (1 - mg(t)) \cdot I\kappa B\alpha(t) - i_{1a} \cdot I\kappa B\alpha(t) \\ &\quad + e_{1a} \cdot I\kappa B\alpha_n(t) - a_4 \cdot prot(t) \cdot I\kappa B\alpha(t) \end{aligned}$$

$$\begin{aligned} \frac{d}{dt} IKK(t) &= -k_p \cdot ILRc(t) \cdot IKK(t) + k_{dp} \cdot PP2A(t) \cdot \frac{IKKp(t)}{K_m + IKKp(t)} \\ &\quad - k_{pconst} \cdot IKK(t) - ap_3 \cdot I\kappa B\alpha(t) \cdot IKK(t) \\ &\quad - ap_4 \cdot IKK(t) \cdot NF\kappa B / I\kappa B\alpha(t) + ap_{33} \cdot I\kappa B\alpha / IKK(t) \\ &\quad + ap_{44} \cdot NF\kappa B / I\kappa B\alpha / IKK(t) + p_1 \cdot prot(t) \cdot I\kappa B\alpha / IKK(t) \end{aligned}$$

$$\begin{aligned} \frac{d}{dt} IKKp(t) &= k_p \cdot ILRc(t) \cdot IKK(t) - k_{dp} \cdot PP2A(t) \cdot \frac{IKKp(t)}{K_m + IKKp(t)} \\ &\quad + k_{pconst} \cdot IKK(t) - ap_1 \cdot IKKp(t) \cdot I\kappa B\alpha(t) \\ &\quad + ap_{11} \cdot I\kappa B\alpha / IKKp(t) - ap_2 \cdot IKKp(t) \cdot NF\kappa B / I\kappa B\alpha(t) \\ &\quad + ap_{22} \cdot NF\kappa B / I\kappa B\alpha / IKKp(t) \\ &\quad + a_2 \cdot I\kappa B\alpha / IKKp(t) \cdot (1 - mg(t)) \\ &\quad + a_3 \cdot NF\kappa B / I\kappa B\alpha / IKKp(t) \cdot (1 - mg(t)) \end{aligned}$$

$$\begin{aligned} \frac{d}{dt} I\kappa B\alpha / IKK(t) &= ap_3 \cdot I\kappa B\alpha(t) \cdot IKK(t) - ap_{33} \cdot I\kappa B\alpha / IKK(t) \\ &\quad - k_p \cdot ILRc(t) \cdot I\kappa B\alpha / IKK(t) \\ &\quad + k_{dp} \cdot PP2A(t) \cdot \frac{I\kappa B\alpha / IKKp(t)}{K_m + I\kappa B\alpha / IKKp(t)} \\ &\quad - p_1 \cdot prot(t) \cdot I\kappa B\alpha / IKK(t) \\ &\quad - k_{pconst} \cdot I\kappa B\alpha / IKK(t) \end{aligned}$$

$$\begin{aligned} \frac{d}{dt} I\kappa B\alpha / IKKp(t) &= ap_1 \cdot I\kappa B\alpha(t) \cdot IKKp(t) - ap_{11} \cdot I\kappa B\alpha / IKKp(t) \\ &\quad + k_p \cdot ILRc(t) \cdot I\kappa B\alpha / IKK(t) \\ &\quad - a_2 \cdot I\kappa B\alpha / IKKp(t) \cdot (1 - mg(t)) \\ &\quad - k_{dp} \cdot PP2A(t) \cdot \frac{I\kappa B\alpha / IKKp(t)}{K_m + I\kappa B\alpha / IKKp(t)} \\ &\quad + k_{pconst} \cdot I\kappa B\alpha / IKK(t) \end{aligned}$$

$$\begin{aligned} \frac{d}{dt} NF\kappa B / I\kappa B\alpha / IKK(t) &= ap_4 \cdot IKK(t) \cdot NF\kappa B / I\kappa B\alpha(t) \\ &\quad - ap_{44} \cdot NF\kappa B / I\kappa B\alpha / IKK(t) \\ &\quad - k_p \cdot ILRc(t) \cdot NF\kappa B / I\kappa B\alpha / IKK(t) \\ &\quad + k_{dp} \cdot PP2A(t) \cdot \frac{NF\kappa B / I\kappa B\alpha / IKKp(t)}{K_m + NF\kappa B / I\kappa B\alpha / IKKp(t)} \\ &\quad - k_{pconst} \cdot NF\kappa B / I\kappa B\alpha / IKK(t) \end{aligned}$$

$$\begin{aligned} \frac{d}{dt} NF\kappa B / I\kappa B\alpha / IKKp(t) &= ap_2 \cdot IKKp(t) \cdot NF\kappa B / I\kappa B\alpha(t) \\ &\quad - ap_{22} \cdot NF\kappa B / I\kappa B\alpha / IKKp(t) \\ &\quad - a_3 \cdot NF\kappa B / I\kappa B\alpha / IKKp(t) \cdot (1 - mg(t)) \\ &\quad + k_p \cdot ILRc(t) \cdot NF\kappa B / I\kappa B\alpha / IKK(t) \\ &\quad - k_{dp} \cdot PP2A \cdot \frac{NF\kappa B / I\kappa B\alpha / IKKp(t)}{K_m + NF\kappa B / I\kappa B\alpha / IKKp} \\ &\quad + k_{pconst} \cdot NF\kappa B / I\kappa B\alpha / IKK(t) \end{aligned}$$

In contrast to variants M-1 and M-2 a constitutive I $\kappa$ B $\alpha$  mRNA synthesis ( $c_{transc}$ ) in M-3 is not necessarily required to reproduce all experimental data since fitting M-3 without  $c_{transc}$  to experimental data results only in a slight decrease of the fit quality (overall  $\chi^2 = 100.6$  compared to 98.6). Thus parameter  $c_{transc}$  is not included in our final model M-3. This is in line with the models of Lipniacki et al. and Ashall et al. assuming that only nuclear NF $\kappa$ B initiates I $\kappa$ B $\alpha$  mRNA synthesis [11,41].

Likewise, we did not integrate a constitutive degradation of I $\kappa$ B $\alpha$  in the NF $\kappa$ B:I $\kappa$ B $\alpha$ :IKK complex analogous to constitutive degradation of I $\kappa$ B $\alpha$  in NF $\kappa$ B:I $\kappa$ B $\alpha$  ( $c_{da}$ ) since inclusion of this reaction did not improve fit quality.

The entire ODE system of each model variant is shown in Text S1, S2, S3.

For parameter estimation as well as for solving and analyzing the ordinary differential equation system we used the MATLAB (Mathworks) toolbox PottersWheel [42]. For optimization the  $\chi^2$  value of the following objective function was minimized by using a trust region approach:

$$\chi^2(p) = \sum_{i=1}^N \left( \frac{y_i - f(t_i; p)}{\sigma_i} \right)^2$$

The  $\chi^2$ -value depends on the estimated parameter values. Variable  $y$  represents the  $i$ -th measured value whereas  $f$  states the simulated state value at time point  $i$  and is dependent on the parameter values  $p$ . The factor  $\sigma_i$  represents the standard deviation.

Besides the newly introduced parameters the fitted parameters of the previous model were also included in the parameter estimation with the same parameter boundaries (Table S1). Scaling parameters were included to take the lack of absolute values of the experimental data into account.

Fit sequences were applied in the estimation process: the starting value of each parameter in a sequence was thereby calculated as

$$p^* = p \cdot 10^{\epsilon}$$

The Factor  $p$  represents the fitted parameter value of the currently best fit of the fit sequence (PottersWheel F3 routine) and the variable  $\epsilon$  determines the strength of disturbance where  $\epsilon \sim N(0, n)$ . Four subsequent runs were performed with 100 fits each using  $n = 4, 1, 0.1, 0.01$ , respectively.

In addition we performed an identifiability analysis of the final model M-3, using the top 10% of 300 fits with random starting conditions. Many parameters are well identifiable with a low relative standard Deviation (Table S1). Furthermore for some of the less identifiable parameters, linear or non-linear correlations with other parameters exist which indicate that combinations of these parameters are identifiable (Table S1).

All models are provided as PottersWheel model datasets in the supplemental data.

## Supporting Information

**Dataset S1 PottersWheel model file of model variant M\_1.**

(TXT)

**Dataset S2 PottersWheel model file of model variant M\_2.**

(TXT)

**Dataset S3 PottersWheel model file of model variant M\_3.**

(TXT)

**Figure S1 Overall simulation data of model variant M-1.** The 125 data points and standard deviations are depicted in blue. Simulation data is shown in red with an overall  $\chi^2$  value of 97.

(PDF)

**Figure S2 Overall simulation data of model variant M-1 including the IKK knock down experiment.** Fitting M-1 additionally to the IKK knock down experiment increases the  $\chi^2$  value to 129. The 127 data points and standard deviations are depicted in blue, simulation data is shown in red.

(PDF)

**Figure S3 Schematic representation of model M-2.** State variables are depicted in blue, inputs in orange and red, respectively. Reactions and variables adopted from previous models (M-1 or Witt et al. [15]) are shown in grey.

(PDF)

**Figure S4 Overall simulation data of model M-2 including the IKK knock down experiment.** The model was fitted to 127 data points and revealed an overall  $\chi^2$  value of 119. Experimental data and standard deviation is depicted in blue. The red line represents simulation data of the best fit.

(PDF)

**Figure S5 Simulated time courses of model variant M-3 from start of integration with or without IKK knock down.** The impact of the IKK knock down on steady state concentration of free I $\kappa$ B $\alpha$  (A), NF $\kappa$ B:I $\kappa$ B $\alpha$  (B) and nuclear NF $\kappa$ B (C) is depicted in green. The simulated time courses without any input are shown in orange.

(PDF)

**Figure S6 Impact of  $a_4$ , the rate constant of protease-mediated degradation of free I $\kappa$ B $\alpha$ , after IKK knock down and OVA treatment for 8 h.** Setting  $a_4$  to zero reveals the influence of this reaction on observed I $\kappa$ B $\alpha$  concentration (green). Reference (red) represents the simulation data of the best fit whereas experimental data and standard deviation is depicted in blue.

(PDF)

**Table S1 Description and correlation analysis of parameters of model variant M-3.** For calculation of the standard deviation (SD) and correlation analysis the best 10% of 300 fits are used.

(PDF)

**Table S2 Portions of I $\kappa$ B $\alpha$  components.**

(PDF)

**Text S1 ODE system of model variant M-1.**

(PDF)

**Text S2 ODE system of model variant M-2.**

(PDF)

**Text S3 ODE system of model variant M-3.**

(PDF)

## Acknowledgments

We thank Anna Moosmann for help with size exclusion chromatography.

## Author Contributions

Conceived and designed the experiments: FK DK. Performed the experiments: FK. Analyzed the data: FK JW TS DK. Contributed reagents/materials/analysis tools: FK JW DK. Wrote the paper: TS DK.

## References

- Wong ET, Tergaonkar V (2009) Roles of NF-kappaB in health and disease: mechanisms and therapeutic potential. *Clin Sci* 116: 451–465.
- Aggarwal BB (2004) Nuclear factor-kappaB: the enemy within. *Cancer Cell* 6: 203–208.
- Barisic S, Strozky E, Peters N, Walczak H, Kulms D (2008) Identification of PP2A as a crucial regulator of the NF-kappaB feedback loop: its inhibition by UVB turns NF-kappaB into a pro-apoptotic factor. *Cell Death Differ* 15: 1681–1690.
- Huang TT, Kudo N, Yoshida M, Miyamoto S (2000) A nuclear export signal in the N-terminal regulatory domain of IkappaBalpha controls cytoplasmic localization of inactive NF-kappaB/IkappaBalpha complexes. *Proc Natl Acad Sci USA* 97: 1014–1019.
- Li Q, Verma IM (2002) NF-kappaB regulation in the immune system. *Nat Rev Immunol* 2: 725–734.
- Delhase M, Hayakawa M, Chen Y, Karin M (1999) Positive and negative regulation of IkappaB kinase activity through IKKbeta subunit phosphorylation. *Science* 284: 309–313.
- Basak S, Behar M, Hoffmann A (2012) Lessons from mathematically modeling the NF-kB pathway. *Immunol Rev* 246: 221–238.
- Cheong R, Hoffmann A, Levchenko A (2008) Understanding NF-kappaB signaling via mathematical modeling. *Mol Syst Biol* 4: 192.
- Hoffmann A, Levchenko A, Scott ML, Baltimore D (2002) The IkappaB-NF-kappaB signaling module: temporal control and selective gene activation. *Science* 298: 1241–1245.
- Kearns JD, Basak S, Werner SL, Huang CS, Hoffmann A (2006) IkappaBepsilon provides negative feedback to control NF-kappaB oscillations, signaling dynamics, and inflammatory gene expression. *J Cell Biol* 173: 659–664.
- Lipniacki T, Paszek P, Allan R, Luxon B, Kimmel M (2004) Mathematical model of NF-kappaB regulatory module. *J Theor Biol* 228: 195–215.
- Behar M, Hoffmann A (2010) Understanding the temporal codes of intracellular signals. *Curr Opin Genet Dev* 20: 684–693.
- Cheong R, Bergmann A, Werner SL, Regal J, Hoffmann A, et al. (2006) Transient IkappaB kinase activity mediates temporal NF-kappaB dynamics in response to a wide range of tumor necrosis factor-alpha doses. *J Biol Chem* 281: 2945–2950.
- Werner SL, Barken D, Hoffmann A (2005) Stimulus specificity of gene expression programs determined by temporal control of IKK activity. *Science* 309: 1857–1861.
- Witt J, Konrath F, Sawodny O, Ederer M, Kulms D, et al. (2012) Analysing the role of UVB-induced translational inhibition and PP2Ac deactivation in NF-kappaB signalling using a minimal mathematical model. *PLoS One* 7: e40274.
- Ihekwa AEC, Broomhead DS, Grimley RL, Benson N, Kell DB (2004) Sensitivity analysis of parameters controlling oscillatory signalling in the NF-kappaB pathway: the roles of IKK and IkappaBalpha. *Syst Biol* 1: 93–103.
- Pöppelmann B, Klimmek K, Strozky E, Voss R, Schwarz T, et al. (2005) NFkB-dependent down-regulation of tumor necrosis factor receptor-associated proteins contributes to interleukin-1-mediated enhancement of ultraviolet B-induced apoptosis. *J Biol Chem* 280: 15635–15643.
- Barisic S, Schmidt C, Walczak H, Kulms D (2010) Tyrosine phosphatase inhibition triggers sustained canonical serine-dependent NFkappaB activation via Src-dependent blockade of PP2A. *Biochem Pharmacol* 80: 439–447.
- Witt J, Barisic S, Schumann E, Allgower F, Sawodny O, et al. (2009) Mechanism of PP2A-mediated IKKbeta dephosphorylation: a systems biological approach. *BMC Syst Biol* 3: 71.
- Chen F, Lu Y, Kuhn DC, Maki M, Shi X, et al. (1997) Calpain contributes to silica-induced I kappa B-alpha degradation and nuclear factor-kappa B activation. *Arch Biochem Biophys* 342: 383–388.
- Shumway SD, Miyamoto S (2004) A mechanistic insight into a proteasome-independent constitutive inhibitor kappaBalpha (IkappaBalpha) degradation and nuclear factor kappaB (NF-kappaB) activation pathway in WEHI-231 B-cells. *Biochem J* 380: 173–180.
- O'Dea EL, Barken D, Peralta RQ, Tran KT, Werner SL, et al. (2007) A homeostatic model of IkappaB metabolism to control constitutive NF-kappaB activity. *Molecular systems biology* 3: 111.
- Imamura R, Konaka K, Matsumoto N, Hasegawa M, Fukui M, et al. (2004) Fas ligand induces cell-autonomous NF-kappaB activation and interleukin-8 production by a mechanism distinct from that of tumor necrosis factor-alpha. *J Biol Chem* 279: 46415–46423.
- Schneider P, Thome M, Burns K, Bodmer JL, Hofmann K, et al. (1997) TRAIL receptors 1 (DR4) and 2 (DR5) signal FADD-dependent apoptosis and activate NF-kappaB. *Immunity* 7: 831–836.
- Gyrd-Hansen M, Meier P (2010) IAPs: from caspase inhibitors to modulators of NF-kappaB, inflammation and cancer. *Nat Rev Cancer* 10: 561–574.
- Schmukle AC, Walczak H (2012) No one can whistle a symphony alone - how different ubiquitin linkages cooperate to orchestrate NF-kappaB activity. *J Cell Sci* 125: 549–559.
- Harhaj EW, Dixit VM (2012) Regulation of NF-kappaB by deubiquitinases. *Immunol Rev* 246: 107–124.
- Massoumi R (2011) CYLD: a deubiquitination enzyme with multiple roles in cancer. *Future Oncol* 7: 285–297.
- Barkett M, Xue D, Horvitz HR, Gilmore TD (1997) Phosphorylation of IkappaB-alpha inhibits its cleavage by caspase CPP32 in vitro. *J Biol Chem* 272: 29419–29422.
- Baxa DM, Yoshimura FK (2003) Genistein reduces NF-kappa B in T lymphoma cells via a caspase-mediated cleavage of I kappa B alpha. *Biochem Pharmacol* 66: 1009–18.
- O'Connor S, Shumway SD, Amanna IJ, Hayes CE, Miyamoto S (2004) Regulation of constitutive p50/c-Rel activity via proteasome inhibitor-resistant IkappaBalpha degradation in B cells. *Mol Cell Biol* 24: 4895–4908.
- Carlotti F, Dower SK, Qwarnstrom EE (2000) Dynamic shuttling of nuclear factor kappa B between the nucleus and cytoplasm as a consequence of inhibitor dissociation. *J Biol Chem* 275: 41028–41034.
- Rice NR, Ernst MK (1993) In vivo control of NF-kappa B activation by I kappa B alpha. *EMBO J* 12: 4685–4695.
- O'Dea EL, Kearns JD, Hoffmann A (2008) UV as an amplifier rather than inducer of NF-kappaB activity. *Mol Cell* 30: 632–641.
- Bouwmeester T, Bauch A, Ruffner H, Angrand PO, Bergamini G, et al. (2004) A physical and functional map of the human TNF-alpha/NF-kappa B signal transduction pathway. *Nat Cell Biol* 6: 97–105.
- Heilker R, Freuler F, Pulfer R, Di Padova F, Eder J (1999) All three IkappaB isoforms and most Rel family members are stably associated with the IkappaB kinase 1/2 complex. *FEBS* 259: 253–261.
- Ganten TM, Koschny R, Sykora J, Schulze-Bergkamen H, Buchler P, et al. (2006) Preclinical differentiation between apparently safe and potentially hepatotoxic applications of TRAIL either alone or in combination with chemotherapeutic drugs. *Clin Cancer Res* 12: 2640–2646.
- Strozky E, Pöppelmann B, Schwarz T, Kulms D (2006) Differential effects of NF-kappaB on apoptosis induced by DNA-damaging agents: the type of DNA damage determines the final outcome. *Oncogene* 25: 6239–6251.
- Roeder RG (1996) The role of general initiation factors in transcription by RNA polymerase II. *Trends Biochem Sci* 21: 327–335.
- Sikorski TW, Buratowski S (2009) The basal initiation machinery: beyond the general transcription factors. *Curr Opin Cell Biol* 21: 344–351.
- Ashall L, Horton CA, Nelson DE, Paszek P, Harper CV, et al. (2009) Pulsatile stimulation determines timing and specificity of NF-kappaB-dependent transcription. *Science* 324: 242–246.
- Maiwald T (2008) Dynamical Modeling and Multi-Experiment Fitting with PottersWheel GÇö Supplement. 1–49.
