# Supplementary material for: Identification of New IκBα Complexes by an Iterative Experimental and Mathematical Modeling Approach
Source: PubMed Central journal article supplement (PMC3967930; doi:10.1371/journal.pcbi.1003528), 2014-03-27

## Supporting Table S1

| name                 | description                                              | value    | relative SD (%)<br>best 10% of 300 fits | fit range                        | unit                              |
|----------------------|----------------------------------------------------------|----------|-----------------------------------------|----------------------------------|-----------------------------------|
| a <sub>1</sub> *     | NFκB:IκBα association                                    | 1.00e+00 | 13                                      | [3.00e-01,1.00e+00]              | μM <sup>-1</sup> .s <sup>-1</sup> |
| a <sub>2</sub> *     | degradation of IKKp bound IκBα                           | 8.00e-01 | 18                                      | [1.00e-07,8.00e-01]              | s <sup>-1</sup>                   |
| a <sub>3</sub> *     | degradation of IκBα in NFκB:IκBα:IKKp complex            | 7.83e-03 | 87                                      | [1.00e-07,8.00e-01]              | s <sup>-1</sup>                   |
| a <sub>4</sub>       | protease mediated degradation of free IκBα               | 9.35e-01 | 37                                      | [1.00e-09,1.00e+00]              | s <sup>-1</sup>                   |
| ap <sub>1</sub>      | complex formation of IκBα:IKKp                           | 9.99e-01 | 16                                      | [1.00e-04,1.00e+00]              | μM <sup>-1</sup> .s <sup>-1</sup> |
| ap <sub>11</sub>     | dissociation of IκBα:IKKp                                | 1.54e-08 | 131                                     | [1.00e-09,1.00e-04]              | s <sup>-1</sup>                   |
| ap <sub>2</sub>      | complex formation of NFκB:IκBα:IKKp                      | 6.08e-03 | 85                                      | [1.00e-04,1.00e+00]              | μM <sup>-1</sup> .s <sup>-1</sup> |
| ap <sub>22</sub>     | dissociation of NFκB:IκBα:IKKp                           | 2.20e-09 | 162                                     | [1.00e-09,1.00e-04]              | s <sup>-1</sup>                   |
| ap <sub>3</sub>      | complex formation of IκBα:IKK                            | 3.42e-02 | 25                                      | [1.00e-04,1.00e+00]              | μM <sup>-1</sup> .s <sup>-1</sup> |
| ap <sub>33</sub>     | dissociation of IκBα:IKK                                 | 4.02e-09 | 125                                     | [1.00e-09,1.00e-04]              | s <sup>-1</sup>                   |
| ap <sub>4</sub>      | complex formation of NFκB:IκBα:IKK                       | 1.00e+00 | 30                                      | [1.00e-04,1.00e+00]              | μM <sup>-1</sup> .s <sup>-1</sup> |
| ap <sub>44</sub>     | dissociation of NFκB:IκBα:IKK                            | 4.12e-05 | 29                                      | [1.00e-09,1.00e-04]              | s <sup>-1</sup>                   |
| c <sub>1a</sub> *    | IκBα mRNA synthesis                                      | 9.20e-07 | 0                                       | [1.00e-10,9.20e-07]              | s <sup>-1</sup>                   |
| c <sub>3a</sub> *    | IκBα mRNA degradation                                    | 2.66e-04 | 4                                       | [2.60e-04,7.70e-04]              | s <sup>-1</sup>                   |
| c <sub>4a</sub> *    | IκBα mRNA translation                                    | 5.00e-01 | 0                                       | [1.00e-07,5.00e-01]              | s <sup>-1</sup>                   |
| c <sub>5a</sub> *    | IKK-independent degradation of free IκBα                 | 8.48e-04 | 15                                      | [5.78e-04,2.00e-03]              | s <sup>-1</sup>                   |
| c <sub>6a</sub> *    | IKK-independent degradation of IκBα in NFκB:IκBα complex | 7.09e-02 | 41                                      | [1.00e-05,1.00e-01]              | s <sup>-1</sup>                   |
| e <sub>1a</sub> *    | IκBα nuclear export                                      | 3.35e-04 | -                                       | calculated as i <sub>1a</sub> /2 | s <sup>-1</sup>                   |
| i <sub>1a</sub> *    | IκBα nuclear import                                      | 6.70e-04 | 1                                       | [1.90e-04,6.70e-04]              | s <sup>-1</sup>                   |
| IKK <sub>start</sub> | start concentration of IKK                               | 2.61e-01 | 10                                      | [2.00e-01,2.00e+00]              | μM                                |
| k <sub>a</sub> *     | ILR complex formation                                    | 8.38e+00 | 5                                       | [1.00e-04,1.00e+03]              | μM <sup>-1</sup> .s <sup>-1</sup> |
| k <sub>dp</sub> *    | IKK dephosphorylation                                    | 1.13e-04 | 8                                       | [1.00e-07,5.00e-02]              | s <sup>-1</sup>                   |
| k <sub>i</sub> *     | ILR complex internalisation                              | 3.77e-03 | 2                                       | [1.00e-07,1.00e+00]              | s <sup>-1</sup>                   |
| k <sub>ilr</sub> *   | ILR turnover                                             | 9.74e-06 | 13                                      | [9.20e-06,2.78e-05]              | s <sup>-1</sup>                   |
| K <sub>m</sub> *     | Michaelis constant for IKK dephosphorylation             | 1.20e-03 | 23                                      | [1.00e-04,1.00e+01]              | μM                                |

| name           | description                                                                                       | value    | relative SD (%)<br>best 10% of 300 fits | fit range           | unit            |
|----------------|---------------------------------------------------------------------------------------------------|----------|-----------------------------------------|---------------------|-----------------|
| $k_{ova}$      | SRC phosphorylation                                                                               | 7.52e-05 | 144                                     | [1.00e-06,1.00e-01] | s <sup>-1</sup> |
| $k_p^*$        | IKK phosphorylation                                                                               | 9.50e-02 | 0                                       | [1.00e-07,9.50e-02] | s <sup>-1</sup> |
| $k_{pconst}^*$ | constitutive IKK phosphorylation                                                                  | 6.35e-05 | 20                                      | [1.00e-10,9.30e-03] | s <sup>-1</sup> |
| $k_{ppdp}$     | dephosphorylation of PP2A <sub>p</sub>                                                            | 3.89e-04 | 81                                      | [1.00e-06,1.00e-02] | s <sup>-1</sup> |
| $k_{prot}$     | activation of protease prot                                                                       | 3.76e-07 | 43                                      | [1.00e-09,1.00e-01] | s <sup>-1</sup> |
| $k_{src}$      | PP2A phosphorylation                                                                              | 4.89e-04 | 87                                      | [1.00e-06,1.00e-01] | s <sup>-1</sup> |
| $k_{uv}^*$     | UV-induced PP2A deactivation                                                                      | 2.16e-04 | 5                                       | [1.00e-07,1.00e+00] | s <sup>-1</sup> |
| $k_v^*$        | volume ratio cytoplasm/nucleus                                                                    | 2.90e+00 | -                                       | fix                 | -               |
| NFκB:IκBα(0)   | start concentration of NFκB:IκBα complex<br>(at timepoint t=0 all NFκB:IκBα is bound<br>to IκBα ) | 6.67e-02 | -                                       | fix                 | μM              |
| $p_1$          | protease mediated degradation of IKK<br>bound IκBα                                                | 2.73e-02 | 38                                      | [1.00e-09,1.00e+00] | s <sup>-1</sup> |
| $s_{IκBα}^*$   | IκBα scaling factor                                                                               | 3.77e+00 | 9                                       | [1.00e-01,1.00e+02] | -               |
| $s_{IκBαt}$    | IκBα mRNA scaling factor                                                                          | 1.07e+04 | 10                                      | [1.00e+03,1.00e+06] | -               |
| $s_{IKK}^*$    | IKK scaling factor                                                                                | 3.63e+00 | 9                                       | [1.00e-01,1.00e+02] | -               |
| $s_{NFκB1}^*$  | NFκB scaling factor<br>(IL-1 stimulation)                                                         | 7.69e+00 | 1                                       | [1.00e-01,1.00e+02] | -               |
| $s_{NFκB2}^*$  | NFκB scaling factor<br>(IL-1+UVB stimulation)                                                     | 8.40e+00 | 1                                       | [1.00e-01,1.00e+02] | -               |
| $uvinh^*$      | UVB-induced translational inhibition                                                              | 8.58e-01 | 1                                       | [1.00e-08,1.00e+00] | -               |
| $volume^*$     | total cell volume                                                                                 | 2.00e+00 | -                                       | fix                 | pl              |

\* Parameter adopted from Witt et al. (2012)

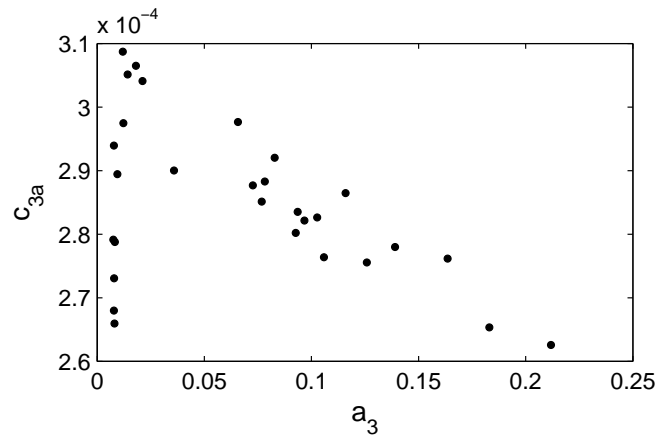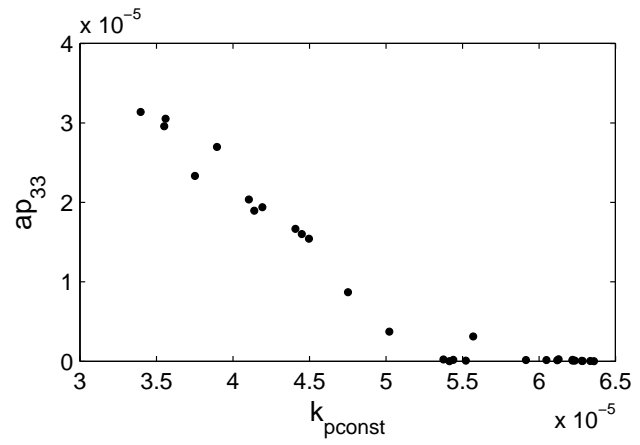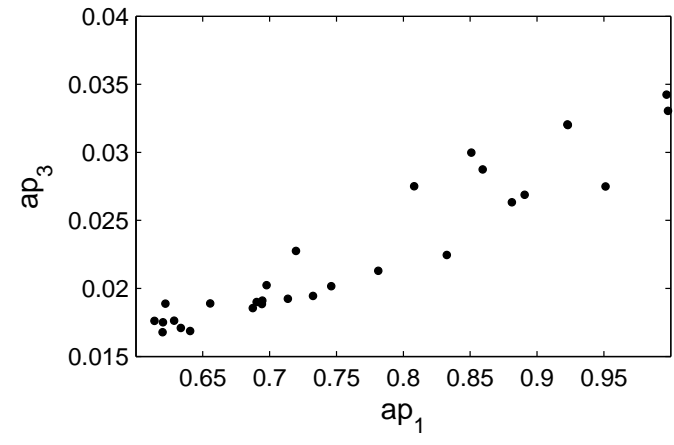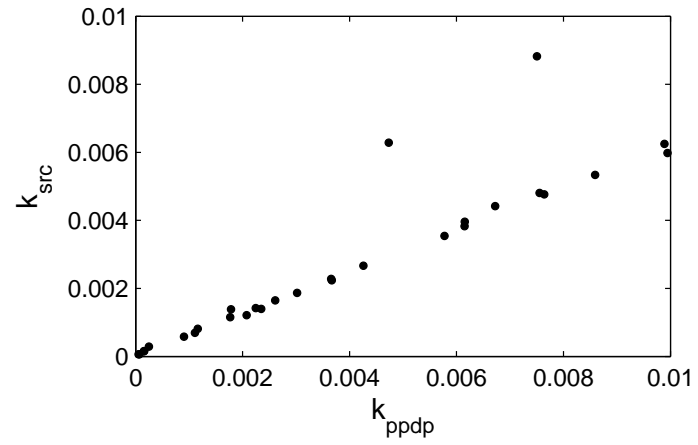

Supplement: pcbi.1003528.s010.pdf [file pcbi.1003528.s010.pdf]
