# Supplementary material for: Identification of New IκBα Complexes by an Iterative Experimental and Mathematical Modeling Approach
Source: PubMed Central journal article supplement (PMC3967930; doi:10.1371/journal.pcbi.1003528), 2014-03-27

# Supporting Figure S5

A

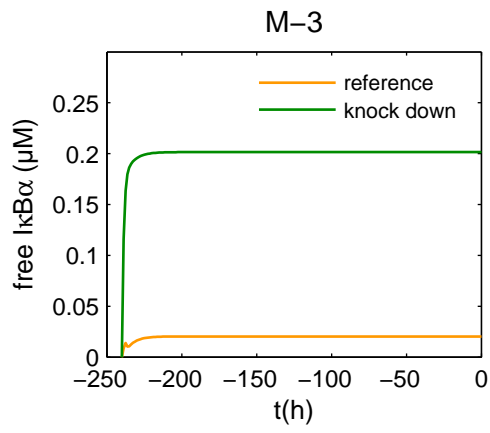

B

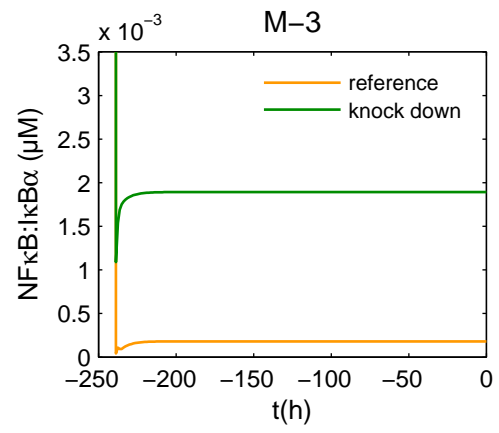

C

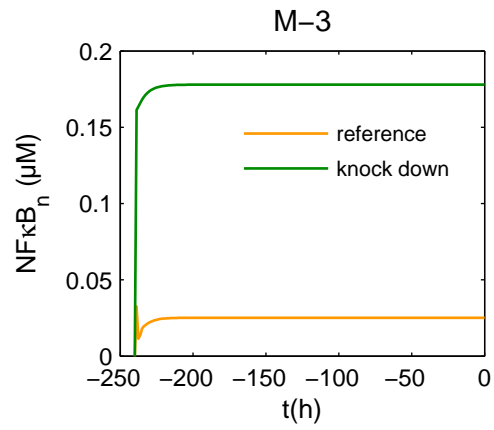

Supplement: pcbi.1003528.s008.pdf [file pcbi.1003528.s008.pdf]
