# Supplementary material for: Identification of New IκBα Complexes by an Iterative Experimental and Mathematical Modeling Approach
Source: PubMed Central journal article supplement (PMC3967930; doi:10.1371/journal.pcbi.1003528), 2014-03-27
Supplement: pcbi.1003528.s011.pdf [file pcbi.1003528.s011.pdf]

## Supporting Table S2

| component                                                          | concentration ( $\mu\text{M}$ ) | portion of overall $\text{I}\kappa\text{B}\alpha$ (%) |
|--------------------------------------------------------------------|---------------------------------|-------------------------------------------------------|
| <b>M-1:</b> (without fitting the model to the IKK knock down data) |                                 |                                                       |
| free $\text{I}\kappa\text{B}\alpha$                                | 0.0414                          | 30.7                                                  |
| $\text{NF}\kappa\text{B}:\text{I}\kappa\text{B}\alpha$             | 0.0672                          | 49.8                                                  |
| $\text{I}\kappa\text{B}\alpha_n$                                   | 0.0264                          | 19.5                                                  |
| <b>M-2:</b>                                                        |                                 |                                                       |
| free $\text{I}\kappa\text{B}\alpha$                                | 0.0285                          | 12.7                                                  |
| $\text{NF}\kappa\text{B}:\text{I}\kappa\text{B}\alpha$             | 0.0671                          | 29.8                                                  |
| $\text{I}\kappa\text{B}\alpha_n$                                   | 0.0162                          | 7.2                                                   |
| $\text{I}\kappa\text{B}\alpha:\text{Comp}$                         | 0.1136                          | 50.4                                                  |
| <b>M-3:</b>                                                        |                                 |                                                       |
| free $\text{I}\kappa\text{B}\alpha$                                | 0.0203                          | 7.60                                                  |
| $\text{NF}\kappa\text{B}:\text{I}\kappa\text{B}\alpha$             | 1.8e-4                          | 0.07                                                  |
| $\text{I}\kappa\text{B}\alpha_n$                                   | 5.2e-4                          | 0.20                                                  |
| $\text{I}\kappa\text{B}\alpha:\text{IKK}$                          | 0.1874                          | 70.24                                                 |
| $\text{I}\kappa\text{B}\alpha:\text{IKKp}$                         | 1.6e-5                          | 0.01                                                  |
| $\text{NF}\kappa\text{B}:\text{I}\kappa\text{B}\alpha:\text{IKK}$  | 0.0584                          | 21.87                                                 |
| $\text{NF}\kappa\text{B}:\text{I}\kappa\text{B}\alpha:\text{IKKp}$ | 3.7e-5                          | 50.01                                                 |
