# Supplementary material for: Identification of New IκBα Complexes by an Iterative Experimental and Mathematical Modeling Approach
Source: PubMed Central journal article supplement (PMC3967930; doi:10.1371/journal.pcbi.1003528), 2014-03-27
Supplement: pcbi.1003528.s013.pdf [file pcbi.1003528.s013.pdf]

## Supporting Text S2

$$\frac{d}{dt}ILLR(t) = -k_a \cdot il1(t) \cdot ILLR(t) + (1 - uv(t) \cdot uvinh) \cdot (1 - chx(t)) \cdot k_{ilr} - ILLR(t) \cdot k_{ilr}$$

$$\frac{d}{dt}ILLRc(t) = k_a \cdot il1(t) \cdot ILLR(t) - k_i \cdot ILLRc(t)$$

$$\frac{d}{dt}IKK(t) = -k_p \cdot ILLRc(t) \cdot IKK(t) + k_{dp} \cdot PP2A(t) \cdot \frac{IKKp}{K_m + IKKp} - k_{pconst} \cdot IKK(t)$$

$$\frac{d}{dt}IKKp(t) = k_p \cdot ILLRc(t) \cdot IKK(t) - k_{dp} \cdot PP2A(t) \cdot \frac{IKKp}{K_m + IKKp} + k_{pconst} \cdot IKK(t)$$

$$\begin{aligned} \frac{d}{dt}I\kappa B\alpha(t) = & -a_2 \cdot (1 - mg(t)) \cdot IKKp(t) \cdot I\kappa B\alpha(t) + \\ & (1 - chx(t)) \cdot (1 - uv(t) \cdot uvinh) \cdot c_{4a} \cdot I\kappa B\alpha_t(t) - \\ & c_{5a} \cdot (1 - mg(t)) \cdot I\kappa B\alpha(t) - i_{1a} \cdot I\kappa B\alpha(t) + \\ & e_{1a} \cdot I\kappa B\alpha_n(t) - ap_1 \cdot I\kappa B\alpha(t) \cdot Comp(t) + \\ & ap_{11} \cdot I\kappa B\alpha | Comp(t) - a_4 \cdot prot(t) \cdot I\kappa B\alpha(t) \end{aligned}$$

$$\frac{d}{dt}I\kappa B\alpha_n(t) = -a_1 \cdot I\kappa B\alpha_n(t) \cdot NF\kappa B_n(t) + i_{1a} \cdot k_v \cdot I\kappa B\alpha(t) - e_{1a} \cdot k_v \cdot I\kappa B\alpha_n(t)$$

$$\frac{d}{dt}I\kappa B\alpha_t(t) = (c_{1a} \cdot NF\kappa B_n(t) + ktransk) \cdot (1 - ActD(t)) - c_{3a} \cdot I\kappa B\alpha_t(t)$$

$$\begin{aligned} \frac{d}{dt}NF\kappa B_n(t) = & k_v \cdot a_3 \cdot (1 - mg(t)) \cdot IKKp(t) \cdot NF\kappa B | I\kappa B\alpha(t) - \\ & a_1 \cdot I\kappa B\alpha_n(t) \cdot NF\kappa B_n(t) + k_v \cdot c_{6a} \cdot NF\kappa B | I\kappa B\alpha(t) \cdot (1 - mg(t)) \end{aligned}$$

$$\begin{aligned} \frac{d}{dt}NF\kappa B | I\kappa B\alpha(t) = & -a_3 \cdot (1 - mg(t)) \cdot IKKp(t) \cdot NF\kappa B | I\kappa B\alpha(t) + \\ & (a_1 \cdot I\kappa B\alpha_n(t) \cdot NF\kappa B_n(t)) \cdot \frac{1}{k_v} - c_{6a} \cdot NF\kappa B | I\kappa B\alpha(t) \cdot (1 - mg(t)) \end{aligned}$$

$$\frac{d}{dt}PP2A(t) = -k_{uv} \cdot uv(t) \cdot PP2A(t) - k_{src} \cdot PP2A(t) \cdot SRCp(t) + k_{ppdp} \cdot PP2Ap(t)$$

$$\frac{d}{dt} PP2Ap(t) = k_{src} \cdot PP2A(t) \cdot SRCp(t) - k_{ppdp} \cdot PP2Ap(t)$$

$$\frac{d}{dt} SRCp(t) = k_{ova} \cdot (1 - SRCp(t)) \cdot ova(t)$$

$$\frac{d}{dt} prot(t) = ova(t) \cdot k_{prot} \cdot (1 - prot(t))$$

$$\begin{aligned} \frac{d}{dt} I\kappa B\alpha|Comp(t) &= ap_1 \cdot I\kappa B\alpha(t) \cdot Comp(t) - ap_{11} \cdot I\kappa B\alpha|Comp(t) - \\ & p_2 \cdot prot(t) \cdot I\kappa B\alpha|Comp(t) - p_1 \cdot I\kappa B\alpha|Comp(t) \cdot IKKp(t) \cdot (1 - mg(t)) \end{aligned}$$

$$\begin{aligned} \frac{d}{dt} Comp(t) &= -ap_1 \cdot I\kappa B\alpha(t) \cdot Comp(t) + ap_{11} \cdot I\kappa B\alpha|Comp(t) + \\ & p_2 \cdot prot(t) \cdot I\kappa B\alpha|Comp(t) + p_1 \cdot I\kappa B\alpha|Comp(t) \cdot IKKp(t) \cdot (1 - mg(t)) \end{aligned}$$
